# Supplementary material for: Patterns of Fungal Diversity in Needles, Rootlets and Soil of Endemic Pinus Peuce
Source: Research Square preprint supplement (doi:10.21203/rs.3.rs-669235/v1), 2021-07-13
Supplement: Supplementary file 1 [file 17d40114017e576c93c1652f.xlsx]

## Sheet: Sheet1
Supplementary Table 1. Relative abundance (%) of fungal taxa associated with the rootlets, soil and needles of Pinus peuce in Montenegro.
Taxon	Phylum	GenBank	Sequence	Compared,	Similarity,		Bogićevica					Visitor					Zeletin					Total
		reference	length, bp	bp	%		Rootlets	Soil	Needles	All		Rootlets	Soil	Needles	All		Rootlets	Soil	Needles	All
Rhizopogon mohelnensis	Basidiomycota	KX610702	341	339/341	99		11.8301	0.0820345	-	5.92266		17.2605	0.459184	-	9.64475		1.8447	0.270392	-	0.97863		5.8305
Suillus sibiricus	Basidiomycota	KM882918	330	328/330	99		2.7451	0.0820345	-	1.38685		19.8598	2.29592	-	11.6541		-	-	-	-		4.66671
Rhizopogon fallax	Basidiomycota	KC152199	345	344/345	99		6.66667	0.410172	-	3.41002		7.21379	0.102041	-	4.00257		7.42171	0.315457	-	3.59497		3.67575
Suillus granulatus	Basidiomycota	KX230633	331	331/331	100		0.0326797	0.0820345	-	0.0326318		17.5234	0.306122	-	9.7412		-	-	-	-		3.50291
Dothideomycetes sp. 3360_7	Ascomycota	KP897336	257	251/257	98		-	-	20.2162	6.10214		-	-	10.1553	1.36634		-	-	20.7877	1.89734		3.1918
Tylospora asterophora	Basidiomycota	AF052558	288	288/288	100		0.359477	5.25021	-	1.22369		-	-	-	-		4.9764	4.10095	-	4.13421		1.6247
Thelephora terrestris	Basidiomycota	KT447173	313	313/313	100		10.2941	0.410172	-	5.22108		0.46729	0.306122	-	0.353641		-	-	-	-		1.97039
Russula vesca	Basidiomycota	DQ422018	321	321/321	100		-	-	-	-		-	-	-	-		2.145	5.49797	-	3.43519		0.990955
Dothideomycetes sp. 3360_10	Ascomycota	NR_145090	238	216/246	88		-	-	11.4595	3.45897		-	0.0510204	14.2174	1.92895		-	-	1.31291	0.119832		1.94734
Phialocephala fortinii	Ascomycota	LC131028	236	236/238	99		5.81699	0.328138	-	2.96949		0.934579	0.0510204	-	0.530461		3.3462	0.0450653	-	1.57779		1.69384
Phlebiopsis gigantea	Basidiomycota	KX426965	302	302/302	100		-	22.8876	-	4.55213		-	-	-	-		-	-	-	-		1.60742
Meliniomyces bicolor	Ascomycota	HQ157926	238	238/238	100		0.751634	0.246103	-	0.424213		0.554907	0.0510204	-	0.321492		6.86401	1.80261	-	3.99441		1.4173
Suillus luteus	Basidiomycota	KX230614	331	331/331	100		1.73203	0.0820345	-	0.881057		5.89953	-	-	3.24707		-	-	-	-		1.47491
Leotiomycetes sp. 3360_16	Ascomycota	KR267039	242	242/243	99		-	-	4.21622	1.27264		-	-	12.0669	1.62353		-	-	5.25164	0.479329		1.16956
Cenococcum geophilum	Ascomycota	HM189723	242	242/242	100		0.0980392	0.0820345	-	0.0652635		-	-	-	-		2.0163	2.07301	-	1.8574		0.558852
Sydowia polyspora	Ascomycota	KU516591	256	256/256	100		-	0.0820345	5.78378	1.76211		-	-	6.57109	0.884102		-	-	5.03282	0.459357		1.07161
Mycena leptocephala	Basidiomycota	HQ604773	310	310/311	99		2.02614	0.656276	-	1.14211		0.642523	0.204082	-	0.417939		3.432	0.180261	-	1.67765		1.03705
Solicoccozyma terricola	Basidiomycota	KY558367	329	329/329	100		0.457516	3.11731	-	0.848426		0.175234	0.612245	-	0.289343		0.2145	4.46147	-	2.07709		1.00248
Celosporium larixicola	Ascomycota	FJ997287	255	249/253	98		-	-	4.64865	1.40317		-	-	8.12425	1.09307		-	-	1.53173	0.139804		0.92758
Tomentella bresadolae	Basidiomycota	KP753365	314	313/314	99		-	-	-	-		-	-	-	-		6.60661	0.180261	-	3.15558		0.910296
Agaricomycetes sp. 3360_18	Basidiomycota	KJ595006	338	318/341	93		1.33987	2.54307	-	1.17474		1.08061	0.102041	0.119474	0.642983		1.4586	0.405588	-	0.858798		0.893011
Hygrocybe intermedia	Basidiomycota	EU784321	344	294/295	99		-	-	-	-		0.525701	6.68367	-	2.39511		-	-	-	-		0.858443
Dothideomycetes sp. 3360_34	Ascomycota	KP891395	241	239/241	99		0.0326797	-	3.94595	1.20737		-	-	6.81004	0.916251		-	-	3.06346	0.279609		0.835398
Gyoerffyella sp. 3360_31	Ascomycota	KU516480	242	242/242	100		0.490196	0.328138	-	0.310002		1.66472	0.102041	-	0.948401		0.557701	0.67598	-	0.559217		0.610705
Agaricomycetes sp. 3360_15	Ascomycota	JX042709	277	241/284	85		1.43791	-	-	0.717899		-	-	-	-		4.1184	-	-	1.91732		0.806591
Neohygrocybe ingrata	Basidiomycota	KF291225	269	268/270	99		0.0326797	4.10172	-	0.83211		-	4.54082	-	1.43064		-	-	-	-		0.806591
Lophodermium pinastri	Ascomycota	HM060657	239	239/239	100		-	-	6.81081	2.0558		-	-	0.119474	0.0160746		-	-	2.18818	0.19972		0.789307
Archaeorhizomyces borealis	Ascomycota	NR_126144	215	215/215	100		0.784314	-	-	0.391581		-	-	-	-		4.5474	0.135196	-	2.17695		0.766261
Suillus variegatus	Basidiomycota	MG597425	329	329/329	100		-	-	-	-		-	0.0510204	-	0.0160746		5.61991	0.0901307	-	2.65628		0.772023
Russula laurocerasi	Basidiomycota	KF245533	321	321/321	100		-	-	-	-		-	-	-	-		0.729301	1.71248	-	1.09846		0.316875
Agaricomycetes sp. 3360_28	Basidiomycota	HQ154222	294	294/294	100		-	0.164069	-	0.0326318		-	-	-	-		1.716	0.360523	-	0.958658		0.288068
Inocybe whitei	Basidiomycota	JF908146	286	286/287	99		-	0.0820345	-	0.0163159		-	-	-	-		0.514801	4.73186	-	2.33673		0.679841
Trechispora sp. 3360_33	Basidiomycota	JX392812	320	318/320	99		0.490196	-	-	0.244738		2.89136	0.102041	-	1.62353		-	-	-	-		0.668318
Clavulina cristata	Basidiomycota	EU862223	333	332/333	99		0.0653595	0.984413	-	0.228422		-	-	-	-		0.429	3.5151	-	1.75754		0.587659
Mortierella humilis	Mucoromycotina	MG052956	333	333/333	100		0.0326797	0.902379	-	0.195791		0.116822	3.11224	-	1.04485		0.2145	1.21676	-	0.639105		0.627989
Dothideomycetes sp. 3360_36	Ascomycota	KP897893	250	230/253	91		-	-	2.16216	0.652635		-	-	1.55317	0.20897		-	-	11.3786	1.03855		0.604943
Tremellomycetes sp. 3360_44	Basidiomycota	KR265945	253	247/253	98		3.36601	-	-	1.68054		-	-	-	-		-	-	-	-		0.593421
Dothideomycetes sp. 3360_46	Ascomycota	FJ554252	241	241/241	100		0.0326797	3.93765	-	0.799478		0.0876168	0.306122	-	0.144671		0.0429	1.80261	-	0.818854		0.570375
Hygrocybe singeri	Basidiomycota	KC581351	318	313/319	98		-	0.0820345	-	0.0163159		0.496495	3.92857	-	1.51101		-	0.0901307	-	0.0399441		0.558852
Mucoromycotina sp. 3360_37	Mucoromycotina	KR265910	297	290/298	97		0.0980392	2.1329	-	0.47316		0.116822	2.60204	-	0.884102		-	0.360523	-	0.159776		0.530046
Archaeorhizomycetes sp. 3360_50	Ascomycota	KR266833	211	210/211	99		-	-	-	-		-	1.32653	-	0.417939		0.0429	2.97431	-	1.33813		0.535807
Inocybe rufoalba	Basidiomycota	KX602273	274	274/274	100		2.64706	0.656276	-	1.45211		-	-	-	-		-	0.0450653	-	0.019972		0.518523
Leohumicola minima	Ascomycota	HQ691252	241	241/241	100		0.457516	0.246103	-	0.27737		0.671729	2.39796	-	1.12522		-	0.0450653	-	0.019972		0.507
Agaricomycetes sp. 3360_47	Basidiomycota	HF565071	304	274/274	100		-	-	-	-		-	-	-	-		1.2441	0.225327	-	0.679049		0.195886
Microbotryomycetes sp. 3360_57	Basidiomycota	KC818329	303	303/303	100		0.0980392	0.328138	-	0.114211		0.0584112	1.17347	-	0.401865		0.0858001	2.02794	-	0.938686		0.455148
Agaricomycetes sp. 3360_35	Basidiomycota	JF519610	305	305/305	100		0.0326797	-	-	0.0163159		0.292056	-	-	0.160746		2.8314	0.0901307	-	1.3581		0.455148
Leotiomycetes sp. 3360_63	Ascomycota	HQ021989	242	242/242	100		0.0653595	0.574241	-	0.146843		0.204439	2.2449	-	0.819804		0.0429	0.811176	-	0.379469		0.455148
Dothideomycetes sp. 3360_72	Ascomycota	KR266782	235	235/235	100		0.294118	0.328138	-	0.212106		1.19743	0.357143	-	0.77158		0.686401	-	-	0.319553		0.443625
Pezizomycotina sp. 3360_156	Ascomycota	HM488471	239	238/239	99		0.784314	0.902379	-	0.571056		0.0876168	0.0510204	-	0.0642983		1.0296	0.315457	-	0.619133		0.403296
Laccaria laccata	Basidiomycota	KM067834	300	300/300	100		-	-	0.0540541	0.0163159		-	-	-	-		0.943801	2.25327	-	1.43799		0.42058
Leotiomycetes sp. 3360_51	Ascomycota	FR846479	237	237/237	100		-	0.246103	3.18919	1.01158		-	-	0.477897	0.0642983		-	0.0450653	1.75055	0.179748		0.432102
Eurotiomycetes sp. 3360_54	Ascomycota	KF617857	257	257/257	100		0.555556	0.820345	-	0.440529		0.379673	1.47959	-	0.675133		0.1287	0.0901307	-	0.0998602		0.426341
Dothideomycetes sp. 3360_55	Ascomycota	KC876287	239	236/240	98		1.76471	-	-	0.881057		0.204439	-	-	0.112522		0.557701	-	-	0.259637		0.426341
Agaricomycetes sp. 3360_49	Basidiomycota	KM402954	292	292/293	99		-	-	-	-		-	-	-	-		0.557701	2.65886	-	1.43799		0.414818
Pseudotricholoma metapodium	Basidiomycota	KJ417308	308	307/309	99		-	-	-	-		0.0584112	3.62245	-	1.17344		-	-	-	-		0.42058
Helotiales sp. 3360_53	Ascomycota	HQ845750	242	242/242	100		-	-	2.16216	0.652635		-	-	3.22581	0.434014		-	-	0.656455	0.0599161		0.403296
Cladosporium macrocarpum	Ascomycota	MF077231	242	242/243	99		0.0326797	0.492207	1.45946	0.55474		-	0.867347	0.83632	0.38579		0.0429	0.0901307	1.96937	0.239664		0.403296
Eurotiomycetes sp. 3360_45	Ascomycota	FJ475710	258	244/258	95		0.915033	-	-	0.456845		0.963785	0.357143	-	0.642983		-	-	-	-		0.391773
Agaricomycetes sp. 3360_79	Basidiomycota	FJ475683	320	317/320	99		2.18954	-	-	1.09316		-	-	-	-		-	-	-	-		0.386011
Leotiomycetes sp. 3360_77	Ascomycota	JF449635	241	241/241	100		-	-	1.83784	0.55474		-	-	2.50896	0.337566		0.0429	0.135196	1.31291	0.19972		0.374489
Rhizoscyphus ericae	Ascomycota	JQ711893	240	235/240	98		1.20915	0.0820345	-	0.620003		-	-	-	-		0.557701	0.135196	-	0.319553		0.311114
Chroogomphus helveticus	Basidiomycota	GU187514	344	339/344	99		0.816993	-	-	0.407897		0.876168	-	-	0.482238		0.1287	-	-	0.0599161		0.334159
Dothideomycetes sp. 3360_96	Ascomycota	FR682183	242	240/242	99		-	-	0.432432	0.130527		-	-	2.50896	0.337566		-	-	7.00219	0.639105		0.351443
Agaricomycetes sp. 3360_65	Basidiomycota	HF674653	314	314/314	100		-	-	-	-		-	-	-	-		0.3861	1.0365	-	0.639105		0.184364
Colpoma sp. 3360_87	Ascomycota	KP276572	243	240/245	98		1.69935	-	-	0.848426		-	-	-	-		-	-	-	-		0.299591
Lachnum cf. pygmaeum	Ascomycota	KY200575	237	237/238	99		0.359477	0.574241	-	0.293686		0.846963	-	-	0.466163		0.1716	0.180261	-	0.159776		0.316875
Amphinema sp. 3360_88	Basidiomycota	KP753294	288	288/288	100		1.66667	0.246103	-	0.881057		-	-	-	-		-	-	-	-		0.311114
Agaricomycetes sp. 3360_61	Basidiomycota	HM488497	286	281/286	98		0.947712	1.47662	-	0.766846		0.175234	-	-	0.0964475		-	-	-	-		0.305352
Agaricomycetes sp. 3360_82	Basidiomycota	KX115677	312	310/312	99		1.53595	0.246103	-	0.815794		0.0584112	-	-	0.0321492		-	-	-	-		0.299591
Rhytismatales sp. 3360_73	Ascomycota	KC480046	240	240/241	99		1.69935	-	-	0.848426		-	-	-	-		-	-	-	-		0.299591
Resinicium bicolor	Basidiomycota	MF319079	292	291/292	99		-	-	-	-		-	-	-	-		1.9734	0.225327	-	1.01857		0.29383
Agaricomycetes sp. 3360_60	Basidiomycota	HF675445	303	303/304	99		1.43791	-	-	0.717899		-	-	-	-		0.2145	0.0450653	-	0.119832		0.288068
Lactarius deterrimus	Basidiomycota	AF249286	358	358/358	100		1.63399	-	-	0.815794		-	-	-	-		-	-	-	-		0.288068
Solicoccozyma aeria	Basidiomycota	KX359612	325	325/325	100		0.228758	0.902379	-	0.293686		0.292056	1.02041	-	0.482238		-	0.0450653	-	0.019972		0.282307
Leotiomycetes sp. 3360_80	Ascomycota	JN655656	242	241/242	99		0.555556	0.0820345	-	0.293686		0.0584112	0.153061	-	0.0803729		0.643501	0.405588	-	0.479329		0.270784
Cryptococcus podzolicus	Basidiomycota	KJ701018	255	255/255	100		0.130719	1.06645	-	0.27737		0.0292056	0.408163	-	0.144671		0.0858001	0.766111	-	0.379469		0.259261
Hydnum ellipsosporum	Basidiomycota	KX388666	309	309/309	100		-	-	-	-		-	-	-	-		-	0.630915	-	0.279609		0.0806591
Mucoromycotina sp. 3360_91	Mucoromycotina	EU690137	344	333/336	99		0.0326797	0.0820345	-	0.0326318		-	0.102041	-	0.0321492		-	1.89274	-	0.838826		0.265023
Trechisporales sp. 3360_105	Basidiomycota	KU973892	298	298/298	100		0.424837	-	-	0.212106		0.116822	-	-	0.0642983		0.686401	0.585849	-	0.579189		0.265023
Russula integra	Basidiomycota	KM085365	350	350/350	100		-	-	-	-		-	-	-	-		1.7589	0.135196	-	0.87877		0.2535
Cryptococcus sp. 3360_109	Basidiomycota	KM216339	317	298/299	99		-	-	1.51351	0.456845		-	-	1.19474	0.160746		-	-	1.31291	0.119832		0.2535
Pyronemataceae sp. 3360_56	Ascomycota	KR019795	256	256/256	100		0.522876	0.410172	-	0.342633		0.642523	-	-	0.353641		-	-	-	-		0.247739
Agaricomycetes sp. 3360_62	Basidiomycota	HM234147	293	283/294	96		-	-	-	-		-	-	-	-		1.6302	0.180261	-	0.838826		0.241977
Sordariomycetes sp. 3360_100	Ascomycota	FJ553102	256	256/256	100		1.07843	0.0820345	-	0.55474		-	-	-	-		0.3003	-	-	0.139804		0.236216
Eurotiomycetes sp. 3360_159	Ascomycota	HQ022171	259	253/259	98		0.490196	0.164069	-	0.27737		0.525701	0.204082	-	0.353641		0.0429	0.0450653	-	0.0399441		0.236216
Mortierella camargensis	Mucoromycotina	MF001324	346	346/346	100		0.196078	0.0820345	-	0.114211		-	0.357143	-	0.112522		0.0429	1.08157	-	0.499301		0.224693
Umbelopsis sp. 3360_89	Mucoromycotina	MF101398	293	293/293	100		-	-	-	-		0.0292056	0.306122	-	0.112522		0.0429	1.39703	-	0.639105		0.224693
Inocybe sp. 3360_84	Basidiomycota	FN669215	301	300/302	99		-	-	-	-		-	-	-	-		0.600601	1.08157	-	0.758937		0.218932
Amphinema byssoides	Basidiomycota	KT692928	271	271/272	99		1.01307	0.0820345	-	0.522108		-	-	-	-		0.2574	-	-	0.119832		0.218932
Sarcinomyces crustaceus	Ascomycota	NR_121503	267	265/267	99		-	-	1.67568	0.505792		-	-	0.83632	0.112522		-	-	-	-		0.218932
Phaffia sp. 3360_92	Basidiomycota	HF558647	351	309/355	87		-	-	1.08108	0.326318		-	-	1.91159	0.257193		-	-	0.437637	0.0399441		0.218932
Inocybe nitidiuscula	Basidiomycota	HQ604214	292	283/293	97		-	-	-	-		-	-	-	-		0.1287	1.57729	-	0.758937		0.218932
Amanita submembranacea	Basidiomycota	KX882673	253	253/253	100		0.0326797	1.80476	-	0.375265		-	-	-	-		0.557701	0.0450653	-	0.279609		0.21317
Dothideomycetes sp. 3360_182	Ascomycota	FJ554156	233	233/233	100		0.816993	0.328138	-	0.47316		-	0.0510204	-	0.0160746		-	0.360523	-	0.159776		0.218932
Paraphaeosphaeria sporulosa	Ascomycota	KX664338	245	245/245	100		-	-	-	-		-	1.78571	-	0.562611		-	-	-	-		0.201648
Leotiomycetes sp. 3360_83	Ascomycota	KJ827884	238	237/238	99		-	-	-	-		-	1.78571	-	0.562611		-	-	-	-		0.201648
Cuphophyllus colemannianus	Basidiomycota	KM248879	307	301/310	97		-	-	-	-		-	1.78571	-	0.562611		-	-	-	-		0.201648
Cadophora orchidicola	Ascomycota	LT821468	241	241/242	99		0.0326797	0.0820345	-	0.0326318		0.613318	0.306122	-	0.434014		0.1716	0.0901307	-	0.119832		0.201648
Leotiomycetes sp. 3360_114	Ascomycota	KR267017	240	240/241	99		0.0980392	-	-	0.0489476		0.233645	1.17347	-	0.498312		-	-	-	-		0.195886
Didymella macrostoma	Ascomycota	MH203391	249	249/249	100		-	0.0820345	0.648649	0.212106		0.0292056	0.357143	0.83632	0.241119		-	0.135196	0.656455	0.119832		0.195886
Tarzetta sp. 3360_152	Ascomycota	AJ969614	274	274/274	100		-	-	-	-		-	-	-	-		0.0429	1.48716	-	0.679049		0.195886
Leotiomycetes sp. 3360_123	Ascomycota	JQ346970	243	243/243	100		0.653595	-	-	0.326318		0.0292056	-	-	0.0160746		0.0429	0.0450653	-	0.0399441		0.132511
Saccharomycetes sp. 3360_137	Basidiomycota	MF483204	322	320/325	98		0.130719	1.88679	-	0.440529		-	0.255102	-	0.0803729		-	0.0450653	-	0.019972		0.190125
Russula puellaris	Basidiomycota	HM189943	352	352/352	100		-	-	-	-		-	-	-	-		-	1.35196	-	0.599161		0.172841
Piloderma bicolor	Basidiomycota	KP814514	283	283/283	100		1.04575	-	-	0.522108		-	-	-	-		-	-	-	-		0.184364
Eurotiomycetes sp. 3360_126	Ascomycota	FR682181	248	248/248	100		-	-	1.24324	0.375265		-	-	0.597372	0.0803729		-	-	0.656455	0.0599161		0.178602
Inocybe subcarpta	Basidiomycota	HQ604208	287	285/287	99		0.980392	0.0820345	-	0.505792		-	-	-	-		-	-	-	-		0.178602
Lachnellula calyciformis	Ascomycota	KC464636	239	239/239	100		-	-	1.62162	0.489476		-	-	-	-		-	-	-	-		0.172841
Dothideomycetes sp. 3360_115	Ascomycota	AM901716	239	221/242	91		-	-	0.864865	0.261054		-	-	1.67264	0.225044		-	-	-	-		0.172841
Epithamnolia xanthoriae	Ascomycota	KY814539	237	233/238	98		-	-	1.2973	0.391581		-	-	0.597372	0.0803729		-	-	0.218818	0.019972		0.172841
Microbotryomycetes sp. 3360_104	Basidiomycota	HQ021788	320	315/322	98		-	-	-	-		-	-	-	-		0.0429	1.26183	-	0.579189		0.16708
Pleotrichocladium opacum	Ascomycota	NR_155696	244	244/244	100		0.228758	0.164069	-	0.146843		0.0584112	0.306122	-	0.128597		0.0429	0.405588	-	0.19972		0.155557
Agaricomycetes sp. 3360_128	Basidiomycota	JF519253	321	320/321	99		-	-	-	-		-	-	-	-		1.2441	-	-	0.579189		0.16708
Russula cyanoxantha	Basidiomycota	KR364093	316	316/316	100		-	-	-	-		-	-	-	-		0.4719	0.811176	-	0.579189		0.16708
Chroogomphus rutilus	Basidiomycota	DQ367894	324	315/325	97		0.947712	-	-	0.47316		-	-	-	-		-	-	-	-		0.16708
Hygrocybe persistens var. konradii	Basidiomycota	FM208893	333	299/306	98		-	0.0820345	-	0.0163159		0.175234	1.07143	-	0.434014		-	-	-	-		0.161318
Tremellomycetes sp. 3360_93	Basidiomycota	KR265960	251	251/251	100		-	-	1.08108	0.326318		-	-	0.358423	0.0482238		-	-	0.875274	0.0798882		0.155557
Sordariomycetes sp. 3360_119	Ascomycota	LN910167	309	213/216	99		-	-	-	-		-	1.27551	-	0.401865		-	0.0901307	-	0.0399441		0.155557
Leotiomycetes sp. 3360_146	Ascomycota	FJ827178	238	238/239	99		0.0980392	-	-	0.0489476		0.0584112	-	-	0.0321492		0.2145	0.0901307	-	0.139804		0.0691364
Leotiomycetes sp. 3360_162	Ascomycota	FJ378856	237	237/238	99		0.588235	0.246103	-	0.342633		-	0.0510204	-	0.0160746		0.1287	0.0901307	-	0.0998602		0.155557
Hymenogaster pruinatus	Basidiomycota	GU479240	306	292/294	99		-	-	-	-		-	-	-	-		0.3003	0.901307	-	0.539245		0.155557
Heterocephalacria sp. 3360_118	Basidiomycota	MG909556	309	300/309	97		-	-	0.594595	0.179475		-	-	1.31422	0.17682		-	-	0.875274	0.0798882		0.149795
Agaricomycetes sp. 3360_134	Basidiomycota	KX115896	305	303/305	99		0.0653595	0.492207	-	0.130527		0.175234	0.459184	-	0.241119		0.0858001	0.0450653	-	0.0599161		0.149795
Tuber sp. 3360_155	Ascomycota	MF352808	290	290/290	100		-	-	-	-		-	-	-	-		1.0296	0.0901307	-	0.519273		0.149795
Eurotiomycetes sp. 3360_183	Ascomycota	MF571440	250	236/253	93		-	-	-	-		-	1.32653	-	0.417939		-	-	-	-		0.149795
Clavulinopsis laeticolor	Basidiomycota	EU118618	302	300/302	99		0.0326797	1.96883	-	0.407897		-	-	-	-		-	-	-	-		0.144034
Hygrocybe punicea i	Basidiomycota	KF291133	305	302/302	100		-	-	-	-		-	1.27551	-	0.401865		-	-	-	-		0.144034
Leotiomycetes sp. 3360_196	Ascomycota	KU871238	242	242/242	100		-	-	-	-		-	-	-	-		0.0858001	-	-	0.0399441		0.0115227
Leotiomycetes sp. 3360_207	Ascomycota	HG513095	243	243/244	99		0.163399	-	-	0.0815794		0.46729	0.204082	-	0.321492		-	-	-	-		0.144034
Clavulina rugosa	Basidiomycota	EU862224	338	338/338	100		-	-	-	-		-	-	-	-		0.429	0.585849	-	0.459357		0.132511
Hygrocybe sp. 3360_129	Basidiomycota	KF291176	322	315/327	96		-	-	-	-		0.0292056	1.17347	-	0.38579		-	-	-	-		0.138273
Eurotiomycetes sp. 3360_143	Ascomycota	HM230883	264	248/264	94		0.490196	-	-	0.244738		0.233645	0.0510204	-	0.144671		-	-	-	-		0.138273
Hyaloscypha leuconica var. bulbopilosa	Ascomycota	JN033451	236	235/236	99		0.0326797	-	-	0.0163159		0.0876168	-	-	0.0482238		0.3432	0.0901307	-	0.19972		0.0806591
Oidiodendron chlamydosporicum	Ascomycota	MG597466	234	234/235	99		-	0.246103	-	0.0489476		-	0.204082	-	0.0642983		0.2574	0.495719	-	0.339525		0.138273
Dothideomycetes sp. 3360_170	Ascomycota	FJ554038	249	246/247	99		0.0326797	-	0.756757	0.244738		-	-	0.955795	0.128597		-	-	0.218818	0.019972		0.138273
Pezizomycotina sp. 3360_230	Ascomycota	FJ553817	240	238/240	99		0.294118	0.410172	-	0.228422		0.146028	-	-	0.0803729		0.1287	-	-	0.0599161		0.12675
Eurotiomycetes sp. 3360_172	Ascomycota	MF571008	256	240/258	93		-	-	0.972973	0.293686		-	-	0.597372	0.0803729		-	-	-	-		0.132511
Eurotiomycetes sp. 3360_223	Ascomycota	FN565212	248	239/248	96		-	-	-	-		-	-	-	-		0.729301	0.270392	-	0.459357		0.132511
Marasmius scorodonius	Basidiomycota	JN943593	396	396/396	100		-	-	-	-		0.0292056	-	-	0.0160746		0.900901	-	-	0.419413		0.12675
Bulleromyces sp. 3360_141	Basidiomycota	LC272845	268	254/270	94		-	-	0.540541	0.163159		-	-	1.19474	0.160746		-	-	0.437637	0.0399441		0.12675
Rhizoscyphus ericae	Ascomycota	LC131030	238	236/238	99		0.0326797	0.246103	-	0.0652635		0.204439	0.561224	-	0.289343		-	-	-	-		0.12675
Clavaria flavipes	Basidiomycota	KP257119	307	307/307	100		0.0980392	0.820345	-	0.212106		0.0292056	0.408163	-	0.144671		-	-	-	-		0.12675
Leotiomycetes sp. 3360_218	Ascomycota	KJ828161	243	236/243	97		0.718954	-	-	0.358949		-	-	-	-		-	-	-	-		0.12675
Helotiales sp. 3360_300	Ascomycota	KX610429	240	240/240	100		-	-	-	-		0.525701	0.204082	-	0.353641		-	-	-	-		0.12675
Dothideomycetes sp. 3360_306	Ascomycota	JN033400	239	216/241	90		-	-	-	-		0.0584112	1.02041	-	0.353641		-	-	-	-		0.12675
Umbelopsis sp. 3360_133	Mucoromycotina	KF313131	291	291/291	100		-	0.164069	-	0.0326318		0.0584112	0.663265	-	0.241119		0.0429	0.135196	-	0.0798882		0.120989
Humicolopsis cephalosporioides	Ascomycota	KY065165	242	242/242	100		-	-	-	-		-	-	-	-		0.0429	0.901307	-	0.419413		0.120989
Leotiomycetes sp. 3360_169	Ascomycota	KC876167	248	246/248	99		0.0326797	1.64069	-	0.342633		-	-	-	-		-	-	-	-		0.120989
Herpotrichia sp. 3360_181	Ascomycota	KT270203	242	240/242	99		0.294118	0.410172	0.108108	0.261054		-	-	-	-		0.0429	0.180261	-	0.0998602		0.120989
Hyaloscyphaceae sp. 3360_203	Ascomycota	AB986451	238	225/238	95		0.0653595	0.0820345	-	0.0489476		0.0584112	0.816327	-	0.289343		-	-	-	-		0.120989
Tylospora sp. 3360_307	Basidiomycota	MG597440	279	279/279	100		0.0653595	0.164069	-	0.0652635		0.292056	0.0510204	-	0.17682		0.1716	0.0901307	-	0.119832		0.120989
Leotiomycetes sp. 3360_132	Ascomycota	HQ022057	242	242/242	100		0.130719	0.246103	-	0.114211		-	0.510204	-	0.160746		-	0.135196	-	0.0599161		0.115227
Umbelopsis vinacea	Mucoromycotina	KC489486	293	293/294	99		-	0.164069	-	0.0326318		0.146028	0.102041	-	0.112522		-	0.495719	-	0.219692		0.115227
Leotiomycetes sp. 3360_211	Ascomycota	KM246498	240	240/241	99		-	0.73831	-	0.146843		-	-	-	-		0.0429	0.450653	-	0.219692		0.115227
Phacidiopycnis washingtonensis	Ascomycota	KP759280	235	235/239	98		-	-	-	-		-	-	2.27001	0.305417		-	-	0.218818	0.019972		0.115227
Infundichalara microchona	Ascomycota	NR_154074	240	235/240	98		0.0980392	0.410172	-	0.130527		-	-	-	-		0.4719	-	-	0.219692		0.109466
Lecanoromycetes sp. 3360_184	Ascomycota	KJ008842	240	240/240	100		0.0653595	-	-	0.0326318		0.146028	-	-	0.0803729		0.3432	0.135196	-	0.219692		0.103705
Inocybe auricoma	Basidiomycota	HQ604526	259	257/260	99		-	-	-	-		-	-	-	-		0.3432	0.495719	-	0.379469		0.109466
Mucoromycotina sp. 3360_243	Mucoromycotina	KU208027	299	290/300	97		-	0.902379	-	0.179475		-	-	-	-		-	0.360523	-	0.159776		0.109466
Mycena amicta	Basidiomycota	MH145355	310	310/310	100		0.490196	-	-	0.244738		-	-	-	-		0.1716	-	-	0.0798882		0.109466
Eurotiomycetes sp. 3360_148	Ascomycota	KT219248	255	239/255	94		-	-	-	-		-	0.918367	-	0.289343		-	-	-	-		0.103705
Cortinarius rubrobrunneus	Basidiomycota	NR_131851	299	296/301	98		0.457516	0.0820345	-	0.244738		-	0.0510204	-	0.0160746		-	-	-	-		0.0921818
Mollisia minutella	Ascomycota	KU325451	239	238/239	99		-	-	-	-		-	-	-	-		0.729301	0.0450653	-	0.359497		0.103705
Leotiomycetes sp. 3360_236	Ascomycota	KJ827004	243	234/235	99		0.0653595	0.656276	-	0.163159		-	0.306122	-	0.0964475		-	0.0901307	-	0.0399441		0.103705
Rhodosporidiobolus colostri	Basidiomycota	NR_155730	301	301/301	100		0.130719	-	0.27027	0.146843		-	-	0.238949	0.0321492		-	-	1.31291	0.119832		0.0979432
Rutstroemiaceae sp. 3360_280	Ascomycota	KT269323	245	245/246	99		-	1.39459	-	0.27737		-	0.0510204	-	0.0160746		-	-	-	-		0.103705
Genolevuria amylolytica	Basidiomycota	NR_137810	273	265/271	98		-	-	0.594595	0.179475		-	-	0.119474	0.0160746		-	-	1.09409	0.0998602		0.0979432
Hygrocybe punicea	Basidiomycota	KM248892	296	291/303	96		0.0326797	0.328138	-	0.0815794		-	0.612245	-	0.192895		-	-	-	-		0.0979432
Rhizoscyphus ericae	Ascomycota	LC131030	238	234/238	98		-	0.0820345	-	0.0163159		0.26285	0.357143	-	0.257193		-	-	-	-		0.0979432
Oidiodendron griseum	Ascomycota	AF062797	235	235/235	100		0.0326797	0.164069	-	0.0489476		0.0292056	0.306122	-	0.112522		-	0.315457	-	0.139804		0.0979432
Lophodermium conigenum	Ascomycota	HM060651	245	245/245	100		-	-	0.0540541	0.0163159		-	0.0510204	-	0.0160746		-	-	3.28228	0.299581		0.0979432
Dothideomycetes sp. 3360_247	Ascomycota	KP892073	246	239/250	96		-	-	0.378378	0.114211		-	-	1.07527	0.144671		-	-	0.218818	0.019972		0.0979432
Dothideomycetes sp. 3360_267	Ascomycota	KP897917	245	238/250	95		-	-	0.27027	0.0815794		-	-	0.477897	0.0642983		-	-	1.75055	0.159776		0.0979432
Leotiomycetes sp. 3360_326	Ascomycota	KC753434	238	237/239	99		0.196078	-	-	0.0978953		0.321262	-	-	0.17682		-	-	-	-		0.0979432
Inocybe petiginosa	Basidiomycota	AM882708	275	275/275	100		-	-	-	-		-	-	-	-		0.3861	0.315457	-	0.319553		0.0921818
Eurotiomycetes sp. 3360_204	Ascomycota	KJ188554	283	283/284	99		-	0.0820345	-	0.0163159		-	0.153061	-	0.0482238		0.0858001	0.450653	-	0.239664		0.0921818
Sebacina epigaea	Basidiomycota	JQ665490	290	290/290	100		-	-	-	-		-	-	-	-		0.0858001	0.630915	-	0.319553		0.0921818
Eurotiomycetes sp. 3360_219	Ascomycota	KX116038	250	238/253	94		-	0.492207	-	0.0978953		-	0.510204	-	0.160746		-	-	-	-		0.0921818
Microglossum olivaceum	Ascomycota	KC595251	240	213/216	99		-	-	-	-		0.0292056	0.765306	-	0.257193		-	-	-	-		0.0921818
Mucor hiemalis	Mucoromycotina	MF326610	268	268/269	99		0.228758	0.0820345	-	0.130527		0.0292056	0.204082	-	0.0803729		-	0.135196	-	0.0599161		0.0921818
Pseudogymnoascus pannorum	Ascomycota	MG597475	240	240/241	99		0.0980392	0.246103	-	0.0978953		0.0584112	0.153061	-	0.0803729		0.0429	0.180261	-	0.0998602		0.0921818
Ilyonectria mors-panacis	Basidiomycota	LT821473	256	256/257	99		0.0980392	0.410172	-	0.130527		0.116822	0.0510204	-	0.0803729		0.0858001	0.0450653	-	0.0599161		0.0921818
Hyaloscyphaceae sp. 3360_333	Ascomycota	AB986448	239	226/241	94		0.522876	-	-	0.261054		-	-	-	-		-	-	-	-		0.0921818
Dothideomycetes sp. 3360_167	Ascomycota	KU063812	247	214/256	84		-	-	0.378378	0.114211		-	-	0.477897	0.0642983		-	-	0.875274	0.0798882		0.0864205
Clavulina cf. amethystina	Basidiomycota	EU862208	335	333/335	99		-	-	-	-		-	-	-	-		0.0858001	0.585849	-	0.299581		0.0864205
Taphrina americana	Ascomycota	NR_155874	294	293/294	99		-	-	0.378378	0.114211		-	-	0.955795	0.128597		-	-	-	-		0.0864205
Eurotiomycetes sp. 3360_228	Ascomycota	KJ827128	249	239/249	96		-	-	-	-		-	0.765306	-	0.241119		-	-	-	-		0.0864205
Leotiomycetes sp. 3360_261	Ascomycota	MF568920	236	236/236	100		-	-	-	-		0.204439	0.255102	-	0.192895		0.0429	0.0901307	-	0.0599161		0.0864205
Sordariomycetes sp. 3360_475	Ascomycota	EF635769	261	261/261	100		-	-	-	-		0.408879	0.0510204	-	0.241119		-	-	-	-		0.0864205
Taphrina vestergrenii	Ascomycota	NR_155886	315	312/315	99		-	-	0.432432	0.130527		-	-	0.238949	0.0321492		-	-	0.875274	0.0798882		0.0806591
Leotiomycetes sp. 3360_142	Ascomycota	KR266870	237	236/237	99		-	-	-	-		0.0292056	0.663265	-	0.225044		-	-	-	-		0.0806591
Hygrophorus eburneus	Basidiomycota	AY463485	293	293/293	100		-	-	-	-		-	-	-	-		0.557701	0.0450653	-	0.279609		0.0806591
Penicillium jensenii	Ascomycota	MH063657	257	257/258	99		0.0653595	0.164069	-	0.0652635		0.146028	0.204082	-	0.144671		-	0.0450653	-	0.019972		0.0806591
Mortierella verticillata	Mucoromycotina	MH304896	333	332/333	99		-	-	-	-		0.0292056	0.663265	-	0.225044		-	-	-	-		0.0806591
Leotiomycetes sp. 3360_195	Ascomycota	HF674577	242	242/242	100		-	-	-	-		-	-	-	-		0.2145	-	-	0.0998602		0.0288068
Agaricomycetes sp. 3360_269	Basidiomycota	JN032542	304	239/257	93		-	-	-	-		0.0292056	0.612245	-	0.20897		-	-	-	-		0.0748977
Eurotiomycetes sp. 3360_281	Ascomycota	FJ553681	256	241/241	100		-	-	0.378378	0.114211		-	-	0.83632	0.112522		-	-	-	-		0.0806591
Sebacina sp. 3360_322	Basidiomycota	KM576578	241	294/294	100		0.457516	-	-	0.228422		-	-	-	-		-	-	-	-		0.0806591
Sebacina sp. 3360_355	Basidiomycota	KM576578	294	294/294	100		-	-	-	-		-	-	-	-		0.1287	0.495719	-	0.279609		0.0806591
Penicillium spinulosum	Ascomycota	KX302054	250	250/251	99		-	0.328138	-	0.0652635		-	0.102041	-	0.0321492		0.1716	0.180261	-	0.159776		0.0806591
Leotiomycetes sp. 3360_362	Ascomycota	KU587020	239	235/237	99		0.0326797	0.0820345	-	0.0326318		-	-	-	-		0.4719	0.0450653	-	0.239664		0.0806591
Trichoderma paraviridescens	Ascomycota	MH347308	268	268/268	100		0.228758	-	-	0.114211		0.0292056	0.0510204	-	0.0321492		0.1716	0.0450653	-	0.0998602		0.0806591
Boletus pruinatus	Basidiomycota	KX168647	395	395/395	100		-	-	-	-		-	-	-	-		0.429	0.135196	-	0.259637		0.0748977
Flagellospora leucorhynchos	Ascomycota	KC834049	233	230/240	96		-	-	-	-		0.379673	-	-	0.20897		-	-	-	-		0.0748977
Taphrina carpini	Ascomycota	MF927666	292	290/293	99		-	-	0.432432	0.130527		-	-	0.477897	0.0642983		-	-	0.218818	0.019972		0.0748977
Inocybe sp. 3360_199	Basidiomycota	KM409417	293	293/293	100		-	-	-	-		-	-	-	-		-	0.585849	-	0.259637		0.0748977
Tremellomycetes sp. 3360_213	Basidiomycota	KP897453	273	268/273	98		-	-	0.540541	0.163159		-	-	0.238949	0.0321492		-	-	0.218818	0.019972		0.0748977
Leotiomycetes sp. 3360_222	Ascomycota	KX116007	241	235/241	98		-	0.492207	-	0.0978953		0.0584112	-	-	0.0321492		-	0.225327	-	0.0998602		0.0748977
Dothideomycetes sp. 3360_273	Ascomycota	KC876203	239	237/239	99		-	-	-	-		-	-	-	-		0.1716	0.0450653	-	0.0998602		0.0288068
Halenospora varia	Ascomycota	KR091829	239	239/239	100		-	-	-	-		-	-	-	-		0.0858001	0.495719	-	0.259637		0.0748977
Leotiomycetes sp. 3360_278	Ascomycota	KJ827376	241	240/242	99		0.0653595	0.164069	-	0.0652635		-	-	-	-		-	0.405588	-	0.179748		0.0748977
Eurotiomycetes sp. 3360_285	Ascomycota	KJ827128	249	240/249	96		0.392157	0.0820345	-	0.212106		-	-	-	-		-	-	-	-		0.0748977
Mucoromycotina sp. 3360_319	Mucoromycotina	HQ022209	299	298/299	99		-	-	-	-		-	-	-	-		-	0.585849	-	0.259637		0.0748977
Eurotiomycetes sp. 3360_377	Ascomycota	MF486314	249	248/250	99		-	-	-	-		-	-	-	-		-	0.585849	-	0.259637		0.0748977
Tremellomycetes sp. 3360_468	Basidiomycota	KP897203	259	238/259	92		-	-	0.378378	0.114211		-	-	0.358423	0.0482238		-	-	0.656455	0.0599161		0.0748977
Trichoderma hunanense	Ascomycota	NR_154571	261	261/261	100		-	-	-	-		0.0292056	0.0510204	-	0.0321492		0.0858001	0.360523	-	0.19972		0.0691364
Penicillium inflatum	Ascomycota	AJ608959	262	252/262	96		-	-	-	-		-	0.612245	-	0.192895		-	-	-	-		0.0691364
Eurotiomycetes sp. 3360_192	Ascomycota	KC876149	271	270/271	99		-	0.0820345	-	0.0163159		-	-	-	-		0.2145	0.180261	-	0.179748		0.0576136
Sordariomycetes sp. 3360_198	Ascomycota	KM492988	294	270/311	87		-	-	-	-		-	0.612245	-	0.192895		-	-	-	-		0.0691364
Dothideomycetes sp. 3360_202	Ascomycota	KR266735	229	220/239	92		0.261438	0.328138	-	0.195791		-	-	-	-		-	-	-	-		0.0691364
Inocybe cf. subnudipes	Basidiomycota	AM882983	297	259/259	100		-	-	-	-		-	-	-	-		0.1716	0.360523	-	0.239664		0.0691364
Mycena strobilinoidea	Basidiomycota	MG654744	312	312/312	100		-	0.0820345	-	0.0163159		-	0.0510204	-	0.0160746		-	-	-	-		0.0115227
Mucoromycotina sp. 3360_233	Mucoromycotina	KX115766	333	333/333	100		-	0.0820345	-	0.0163159		-	0.0510204	-	0.0160746		0.0429	0.405588	-	0.19972		0.0691364
Cryptococcus sp. 3360_256	Basidiomycota	KU057816	248	247/248	99		-	-	0.486486	0.146843		-	-	0.358423	0.0482238		-	-	-	-		0.0691364
Alternaria alternata	Ascomycota	MF497381	253	253/253	100		-	-	0.27027	0.0815794		-	0.102041	0.238949	0.0642983		-	0.0450653	0.437637	0.0599161		0.0691364
Helotiales sp. 3360_303	Ascomycota	KY228609	241	230/244	94		0.0653595	0.246103	-	0.0815794		-	0.255102	-	0.0803729		-	0.0901307	-	0.0399441		0.0691364
Rhytismatales sp. 3360_314	Ascomycota	KJ406976	241	223/223	100		-	-	-	-		-	-	1.31422	0.17682		-	-	0.218818	0.019972		0.0691364
Sordariomycetes sp. 3360_317	Ascomycota	KT195220	233	233/237	98		0.0326797	-	-	0.0163159		0.116822	0.357143	-	0.17682		-	-	-	-		0.0691364
Dothideomycetes sp. 3360_330	Ascomycota	KP892073	246	237/251	94		-	-	0.486486	0.146843		-	-	0.238949	0.0321492		-	-	0.218818	0.019972		0.0691364
Ascomycota sp. 3360_369	Ascomycota	FJ008678	255	254/255	99		-	-	0.324324	0.0978953		-	-	-	-		-	-	1.31291	0.119832		0.0691364
Spirosphaera beverwijkiana	Ascomycota	EF029215	239	227/240	95		0.0653595	-	-	0.0326318		0.0876168	0.357143	-	0.160746		-	-	-	-		0.0691364
Leotiomycetes sp. 3360_389	Ascomycota	FJ554032	237	231/242	95		0.326797	0.164069	-	0.195791		-	-	-	-		-	-	-	-		0.0691364
Dothideomycetes sp. 3360_448	Ascomycota	KJ827513	242	242/242	100		-	-	0.216216	0.0652635		-	-	0.83632	0.112522		-	-	0.218818	0.019972		0.0691364
Chaetothyriales sp. 3360_450	Ascomycota	KY228801	257	245/259	95		-	0.246103	-	0.0489476		0.204439	0.102041	-	0.144671		-	-	-	-		0.0691364
Agaricomycetes sp. 3360_161	Basidiomycota	HF675636	316	314/317	99		-	-	-	-		-	-	-	-		0.0858001	0.0901307	-	0.0798882		0.0230455
Agaricomycetes sp. 3360_175	Basidiomycota	MF484818	293	283/296	96		0.359477	-	-	0.179475		-	-	-	-		-	-	-	-		0.063375
Tomentella sp. 3360_208	Basidiomycota	AB848642	315	315/315	100		-	-	-	-		-	-	-	-		0.1716	0.315457	-	0.219692		0.063375
Mortierella sp. 3360_227	Mucoromycotina	JX975932	336	330/335	99		-	0.328138	-	0.0652635		-	0.0510204	-	0.0160746		-	0.225327	-	0.0998602		0.0576136
Agaricomycetes sp. 3360_231	Mucoromycotina	MF484108	304	303/305	99		0.359477	-	-	0.179475		-	-	-	-		-	-	-	-		0.063375
Lachnum sp. 3360_286	Ascomycota	KJ542305	237	235/238	99		-	-	-	-		0.321262	-	-	0.17682		-	-	-	-		0.063375
Rhizoscyphus sp. 3360_292	Ascomycota	AB847069	236	223/236	94		0.359477	-	-	0.179475		-	-	-	-		-	-	-	-		0.063375
Lecanoromycetes sp. 3360_293	Ascomycota	KM494215	245	236/246	96		-	-	0.594595	0.179475		-	-	-	-		-	-	-	-		0.063375
Wilcoxina rehmii	Ascomycota	MF926519	254	253/254	99		-	-	-	-		-	-	-	-		0.3861	0.0901307	-	0.219692		0.063375
Agaricomycetes sp. 3360_320	Basidiomycota	AY097046	301	301/303	99		0.0980392	-	-	0.0489476		-	-	-	-		0.3003	0.0450653	-	0.159776		0.063375
Sordariomycetes sp. 3360_324	Ascomycota	KT219230	295	248/257	96		-	0.0820345	-	0.0163159		0.0292056	0.408163	-	0.144671		-	0.0450653	-	0.019972		0.063375
Leotiomycetes sp. 3360_395	Ascomycota	KX776920	237	235/237	99		0.163399	-	-	0.0815794		0.146028	-	-	0.0803729		0.0429	-	-	0.019972		0.063375
Mycocentrospora cantuariensis	Ascomycota	NR_154144	251	243/251	97		-	-	0.378378	0.114211		-	-	-	-		-	-	0.875274	0.0798882		0.063375
Dothideomycetes sp. 3360_474	Ascomycota	FJ554069	244	243/246	99		-	-	0.27027	0.0815794		-	-	0.358423	0.0482238		-	-	0.656455	0.0599161		0.063375
Archaeorhizomycetes sp. 3360_571	Ascomycota	KT219753	214	213/214	99		-	-	-	-		-	0.408163	-	0.128597		-	0.135196	-	0.0599161		0.063375
Sordariomycetes sp. 3360_214	Ascomycota	MF486092	253	252/254	99		-	-	-	-		-	0.510204	-	0.160746		-	-	-	-		0.0576136
Eurotiomycetes sp. 3360_217	Ascomycota	KU839262	285	285/285	100		-	-	-	-		0.233645	0.102041	-	0.160746		-	-	-	-		0.0576136
Hygrocybe cf. cantharellus	Basidiomycota	HM020689	334	332/336	99		-	-	-	-		-	0.510204	-	0.160746		-	-	-	-		0.0576136
Lecanoromycetes sp. 3360_252	Ascomycota	KX776599	239	230/238	97		0.0326797	-	-	0.0163159		0.116822	0.255102	-	0.144671		-	-	-	-		0.0576136
Tetracladium sp. 3360_254	Ascomycota	KJ735010	240	240/241	99		0.0326797	0.164069	-	0.0489476		-	-	-	-		0.0858001	0.135196	-	0.0998602		0.0460909
Neonectria lugdunensis	Ascomycota	KM231762	248	248/256	97		-	0.0820345	-	0.0163159		-	0.102041	-	0.0321492		0.0858001	0.225327	-	0.139804		0.0576136
Hygrocybe persistens	Basidiomycota	JF908062	309	305/309	99		-	-	-	-		-	0.510204	-	0.160746		-	-	-	-		0.0576136
Aureobasidium pullulans	Basidiomycota	KP131644	249	249/249	100		-	-	0.108108	0.0326318		-	-	0.716846	0.0964475		-	-	0.437637	0.0399441		0.0576136
Hyaloscyphaceae sp. 3360_309	Ascomycota	GU393951	242	238/242	98		0.0326797	0.328138	-	0.0815794		0.0292056	-	-	0.0160746		0.0858001	0.0901307	-	0.0798882		0.0576136
Cladophialophora sp. 3360_328	Ascomycota	MG597448	253	241/254	95		-	0.0820345	-	0.0163159		-	-	-	-		0.0429	0.360523	-	0.179748		0.0576136
Oidiodendron echinulatum	Ascomycota	MG597467	236	229/236	97		0.0980392	-	-	0.0489476		0.0876168	-	-	0.0482238		0.1287	0.0450653	-	0.0798882		0.0576136
Mucoromycotina sp. 3360_357	Mucoromycotina	HQ021782	365	364/372	98		0.0326797	0.0820345	-	0.0326318		0.0292056	0.102041	-	0.0482238		0.0429	0.180261	-	0.0998602		0.0576136
Phialocephala fortinii	Ascomycota	AY078132	237	237/238	98		0.0326797	-	-	0.0163159		0.175234	-	-	0.0964475		0.0429	-	-	0.019972		0.0460909
Hodophilus micaceus	Basidiomycota	KU882871	305	305/305	100		-	-	-	-		-	0.510204	-	0.160746		-	-	-	-		0.0576136
Entoloma ochreoprunuloides	Basidiomycota	KC710092	288	288/288	100		-	0.820345	-	0.163159		-	-	-	-		-	-	-	-		0.0576136
Sordariomycetes sp. 3360_518	Ascomycota	KJ827417	249	245/249	98		-	-	-	-		-	-	-	-		-	0.450653	-	0.19972		0.0576136
Helotiales sp. 3360_186	Ascomycota	KX611542	240	239/241	99		0.0326797	0.410172	-	0.0978953		0.0292056	-	-	0.0160746		0.0429	0.0450653	-	0.0399441		0.0518523
Eurotiomycetes sp. 3360_235	Ascomycota	KJ008739	232	224/242	93		-	-	-	-		-	-	-	-		0.1287	0.225327	-	0.159776		0.0460909
Leotiomycetes sp. 3360_238	Ascomycota	KJ826721	243	241/244	99		-	0.410172	-	0.0815794		0.0584112	-	-	0.0321492		-	0.0901307	-	0.0399441		0.0518523
Tremellomycetes sp. 3360_242	Basidiomycota	KY558349	311	259/323	80		-	-	0.378378	0.114211		-	-	0.238949	0.0321492		-	-	-	-		0.0518523
Penicillium miczynskii	Ascomycota	KU727794	255	255/256	99		0.0326797	0.164069	-	0.0489476		0.0292056	0.0510204	-	0.0321492		-	0.180261	-	0.0798882		0.0518523
Dicranophora sp. 3360_289	Mucoromycotina	KT736107	272	246/261	94		-	-	-	-		-	0.459184	-	0.144671		-	-	-	-		0.0518523
Mortierella alpina	Mucoromycotina	KC018216	344	344/344	100		0.0326797	0.246103	-	0.0652635		0.0584112	0.0510204	-	0.0482238		-	0.0901307	-	0.0399441		0.0518523
Fusarium sp. 3360_315	Ascomycota	KT347168	260	260/260	100		-	0.246103	-	0.0489476		0.0292056	0.153061	-	0.0642983		0.0429	-	-	0.019972		0.0460909
Mortierella gamsii	Mucoromycotina	JX975968	344	341/344	99		0.0326797	0.328138	-	0.0815794		-	0.0510204	-	0.0160746		0.0429	0.0901307	-	0.0599161		0.0518523
Symmetrospora gracilis	Basidiomycota	EU002876	299	293/302	97		-	-	0.324324	0.0978953		-	-	0.119474	0.0160746		-	-	0.437637	0.0399441		0.0518523
Phaeothecoidea melaleuca	Ascomycota	KC008881	236	213/216	99		-	0.164069	-	0.0326318		0.0292056	-	-	0.0160746		0.2145	0.0450653	-	0.119832		0.0518523
Leotiomycetes sp. 3360_429	Ascomycota	KJ826841	234	227/235	97		0.196078	0.164069	-	0.130527		-	0.0510204	-	0.0160746		-	-	-	-		0.0518523
Leotiomycetes sp. 3360_439	Ascomycota	HQ021922	237	231/240	96		-	-	-	-		-	0.459184	-	0.144671		-	-	-	-		0.0518523
Agaricomycetes sp. 3360_452	Basidiomycota	EU624338	308	289/296	98		-	-	-	-		0.26285	-	-	0.144671		-	-	-	-		0.0518523
Hyaloscyphaceae sp. 3360_455	Ascomycota	JX852344	240	232/240	97		0.294118	-	-	0.146843		-	-	-	-		-	-	-	-		0.0518523
Eurotiomycetes sp. 3360_461	Ascomycota	KJ826912	250	245/250	98		-	-	-	-		-	0.306122	-	0.0964475		-	0.135196	-	0.0599161		0.0518523
Dothideomycetes sp. 3360_820	Ascomycota	FR682186	251	231/251	92		-	-	0.0540541	0.0163159		-	-	-	-		-	-	1.75055	0.159776		0.0518523
Oidiodendron sp. 3360_165	Ascomycota	AB986458	234	229/234	98		-	0.0820345	-	0.0163159		-	-	-	-		0.0429	0.270392	-	0.139804		0.0460909
Entoloma conferendum	Basidiomycota	MF977971	296	296/296	100		-	-	-	-		0.233645	-	-	0.128597		-	-	-	-		0.0460909
Scopuloides hydnoides	Basidiomycota	LN611118	293	292/293	99		-	-	-	-		-	-	-	-		0.3003	0.0450653	-	0.159776		0.0460909
Typhula intermedia	Basidiomycota	AB267394	296	294/298	99		0.0653595	0.164069	0.216216	0.130527		-	-	-	-		-	-	-	-		0.0460909
Hygrocybe lepida	Basidiomycota	KF306331	328	327/328	99		-	-	-	-		-	0.408163	-	0.128597		-	-	-	-		0.0460909
Eurotiomycetes sp. 3360_253	Ascomycota	JQ346927	262	244/262	93		-	0.0820345	-	0.0163159		0.146028	0.102041	-	0.112522		-	-	-	-		0.0460909
Dothideomycetes sp. 3360_257	Ascomycota	HF947037	246	227/252	90		-	-	0.108108	0.0326318		-	-	0.477897	0.0642983		-	-	0.437637	0.0399441		0.0460909
Mortierella sp. 3360_260	Mucoromycotina	JX270424	340	328/340	96		-	-	-	-		-	-	-	-		-	0.360523	-	0.159776		0.0460909
Agaricomycetes sp. 3360_265	Basidiomycota	FR750601	318	316/318	99		-	-	-	-		-	0.408163	-	0.128597		-	-	-	-		0.0460909
Tetracladium globosum	Ascomycota	JX029133	240	239/241	99		-	0.164069	-	0.0326318		-	0.102041	-	0.0321492		0.0858001	0.0901307	-	0.0798882		0.0460909
Dothideomycetes sp. 3360_351	Ascomycota	KP898201	240	228/240	95		-	-	-	-		-	0.408163	-	0.128597		-	-	-	-		0.0460909
Sagenomella griseoviridis	Ascomycota	LC177648	244	244/249	98		-	-	-	-		-	0.102041	-	0.0321492		-	0.270392	-	0.119832		0.0460909
Eurotiomycetes sp. 3360_361	Ascomycota	MH451802	256	244/256	95		-	-	-	-		0.116822	0.204082	-	0.128597		-	-	-	-		0.0460909
Eurotiomycetes sp. 3360_385	Ascomycota	HQ022171	260	250/260	96		-	-	-	-		0.233645	-	-	0.128597		-	-	-	-		0.0460909
Russula olivacea	Basidiomycota	AF418634	377	372/378	98		-	-	-	-		-	-	-	-		0.2574	0.0901307	-	0.159776		0.0460909
Leotiomycetes sp. 3360_441	Ascomycota	MF665262	238	199/200	99		-	-	-	-		-	0.204082	0.238949	0.0964475		-	-	0.437637	0.0399441		0.0460909
Sagenomella verticillata	Ascomycota	LC177652	260	260/262	99		-	-	-	-		-	-	-	-		-	0.360523	-	0.159776		0.0460909
Sphaerobolus iowensis	Basidiomycota	AY650256	310	309/310	99		0.0326797	0.0820345	-	0.0326318		0.146028	0.0510204	-	0.0964475		-	-	-	-		0.0460909
Dothideomycetes sp. 3360_653	Ascomycota	FJ554220	240	236/241	98		-	-	0.378378	0.114211		-	-	-	-		0.0429	-	-	0.019972		0.0460909
Mucoromycotina sp. 3360_768	Mucoromycotina	HQ022261	326	315/326	97		-	-	-	-		0.0292056	0.357143	-	0.128597		-	-	-	-		0.0460909
Taphrina sacchari	Ascomycota	AF492117	295	289/295	98		-	-	0.216216	0.0652635		-	-	0.358423	0.0482238		-	-	-	-		0.0403296
Hydnotrya michaelis	Ascomycota	EU784275	299	238/244	98		0.228758	-	-	0.114211		-	-	-	-		-	-	-	-		0.0403296
Amphinema diadema	Basidiomycota	GQ162811	288	286/290	99		-	-	-	-		-	-	-	-		0.0858001	0.225327	-	0.139804		0.0403296
Cladophialophora sp. 3360_263	Ascomycota	KF636403	252	248/253	98		-	0.492207	-	0.0978953		-	-	-	-		0.0429	-	-	0.019972		0.0403296
Leotiomycetes sp. 3360_264	Ascomycota	KJ826695	235	233/237	98		-	-	-	-		0.0584112	0.255102	-	0.112522		-	-	-	-		0.0403296
Vishniacozyma victoriae	Basidiomycota	MF062235	234	234/234	100		0.0653595	0.0820345	-	0.0489476		-	0.153061	0.119474	0.0642983		-	-	-	-		0.0403296
Sordariomycetes sp. 3360_287	Ascomycota	KC243967	228	219/233	94		-	-	-	-		0.146028	0.102041	-	0.112522		-	-	-	-		0.0403296
Agaricomycetes sp. 3360_295	Basidiomycota	JQ890252	269	267/270	99		0.163399	-	-	0.0815794		-	-	-	-		0.0858001	-	-	0.0399441		0.0403296
Exobasidiomycetes sp. 3360_296	Basidiomycota	KR262419	288	268/288	93		-	-	0.324324	0.0978953		-	-	0.119474	0.0160746		-	-	-	-		0.0403296
Leotiomycetes sp. 3360_299	Ascomycota	HQ022246	241	236/242	98		-	0.0820345	-	0.0163159		0.0584112	0.153061	-	0.0803729		-	0.0450653	-	0.019972		0.0403296
Eurotiomycetes sp. 3360_302	Ascomycota	KJ826851	248	248/251	99		0.0326797	-	-	0.0163159		-	0.0510204	-	0.0160746		0.0858001	0.135196	-	0.0998602		0.0403296
Eurotiomycetes sp. 3360_329	Ascomycota	MF568997	252	246/252	98		-	0.164069	-	0.0326318		-	0.255102	-	0.0803729		-	-	-	-		0.0403296
Leotiomycetes sp. 3360_339	Ascomycota	KR267040	234	232/235	99		-	-	-	-		-	0.357143	-	0.112522		-	-	-	-		0.0403296
Agaricomycetes sp. 3360_348	Basidiomycota	JQ420999	302	302/302	100		0.0326797	-	-	0.0163159		0.0584112	0.204082	-	0.0964475		-	-	-	-		0.0403296
Leotiomycetes sp. 3360_372	Ascomycota	EF029215	240	225/241	93		0.130719	0.0820345	-	0.0815794		0.0584112	-	-	0.0321492		-	-	-	-		0.0403296
Tomentella sp. 3360_373	Basidiomycota	KM576662	315	314/317	99		-	-	-	-		-	-	-	-		-	0.315457	-	0.139804		0.0403296
Leotiomycetes sp. 3360_392	Ascomycota	KJ826793	239	235/240	98		-	-	-	-		-	0.306122	-	0.0964475		-	-	-	-		0.0345682
Mortierella cystojenkinii	Mucoromycotina	JX976030	330	328/328	100		-	0.0820345	-	0.0163159		0.0292056	-	-	0.0160746		-	0.225327	-	0.0998602		0.0403296
Agaricomycetes sp. 3360_420	Basidiomycota	KJ705174	276	236/296	80		-	-	-	-		-	0.357143	-	0.112522		-	-	-	-		0.0403296
Laccaria laccata	Basidiomycota	KM067889	299	296/301	98		0.0326797	-	-	0.0163159		-	-	-	-		0.0858001	0.180261	-	0.119832		0.0403296
Leotiomycetes sp. 3360_433	Ascomycota	FJ475754	239	231/239	97		0.0653595	-	-	0.0326318		-	-	-	-		0.2145	-	-	0.0998602		0.0403296
Leotiomycetes sp. 3360_442	Ascomycota	EU690593	256	245/248	99		-	-	-	-		-	0.357143	-	0.112522		-	-	-	-		0.0403296
Eurotiomycetes sp. 3360_490	Ascomycota	KJ827879	270	259/271	96		-	-	-	-		-	-	-	-		-	0.315457	-	0.139804		0.0403296
Agaricomycetes sp. 3360_540	Basidiomycota	KC759480	312	312/313	99		-	-	-	-		-	-	-	-		0.1716	0.135196	-	0.139804		0.0403296
Lecanoromycetes sp. 3360_550	Ascomycota	HQ022121	241	238/241	99		-	-	-	-		-	-	-	-		0.2145	0.0901307	-	0.139804		0.0403296
Coniochaeta sp. 3360_584	Ascomycota	MH473956	249	249/249	100		-	-	-	-		0.204439	-	-	0.112522		-	-	-	-		0.0403296
Melanohalea elegantula	Ascomycota	KX457702	242	238/243	98		-	-	-	-		-	-	-	-		-	-	1.53173	0.139804		0.0403296
Dothiora sp. 3360_855	Ascomycota	NR_155059	259	249/260	96		-	-	0.27027	0.0815794		-	-	0.238949	0.0321492		-	-	-	-		0.0403296
Agaricostilbomycetes sp. 3360_237	Basidiomycota	KX195103	289	235/307	77		-	-	0.216216	0.0652635		-	-	0.238949	0.0321492		-	-	-	-		0.0345682
Mortierella sp. 3360_241	Mucoromycotina	MF423576	327	324/330	98		0.0653595	-	-	0.0326318		0.0292056	0.0510204	-	0.0321492		-	0.0901307	-	0.0399441		0.0345682
Agaricomycetes sp. 3360_248	Basidiomycota	KM402927	288	279/292	96		-	-	-	-		-	-	-	-		0.2574	-	-	0.119832		0.0345682
Cystodendron sp. 3360_276	Ascomycota	KX611556	239	237/241	98		-	-	-	-		-	-	-	-		-	0.270392	-	0.119832		0.0345682
Gymnostellatospora japonica	Ascomycota	AF062818	241	239/241	99		-	-	-	-		-	-	-	-		0.1716	0.0901307	-	0.119832		0.0345682
Agaricomycetes sp. 3360_284	Basidiomycota	KX115620	325	314/329	95		-	-	-	-		-	0.306122	-	0.0964475		-	-	-	-		0.0345682
Sordariomycetes sp. 3360_304	Ascomycota	MF976656	243	237/243	98		-	-	-	-		-	-	0.119474	0.0160746		-	-	1.09409	0.0998602		0.0345682
Armillaria ostoyae	Basidiomycota	JN657460	478	478/478	100		-	-	-	-		-	-	-	-		0.2145	0.0450653	-	0.119832		0.0345682
Agaricomycetes sp. 3360_323	Basidiomycota	KC176356	315	241/329	73		-	-	-	-		-	0.306122	-	0.0964475		-	-	-	-		0.0345682
Mortierella antarctica	Mucoromycotina	MH304899	337	336/337	99		-	-	-	-		-	0.306122	-	0.0964475		-	-	-	-		0.0345682
Pseudogymnoascus pannorum	Ascomycota	LN714595	239	236/241	98		0.0326797	-	-	0.0163159		-	-	-	-		-	0.180261	-	0.0798882		0.0288068
Ganoderma applanatum	Basidiomycota	MH160077	288	288/288	100		-	-	-	-		-	0.0510204	-	0.0160746		-	0.225327	-	0.0998602		0.0345682
Eurotiomycetes sp. 3360_345	Ascomycota	KX116037	253	251/253	99		-	-	-	-		-	0.306122	-	0.0964475		-	-	-	-		0.0345682
Eurotiomycetes sp. 3360_359	Ascomycota	MH450451	256	244/257	95		0.0653595	0.0820345	-	0.0489476		-	0.153061	-	0.0482238		-	-	-	-		0.0345682
Mucor hiemalis	Mucoromycotina	MH266219	271	271/272	99		-	0.0820345	-	0.0163159		-	0.153061	-	0.0482238		0.0429	0.0450653	-	0.0399441		0.0345682
Sordariomycetes sp. 3360_370	Ascomycota	MH450805	245	245/246	99		-	-	-	-		-	0.102041	-	0.0321492		-	0.0901307	-	0.0399441		0.0230455
Agaricomycetes sp. 3360_375	Basidiomycota	KX115577	294	291/302	96		0.0326797	-	-	0.0163159		0.0292056	0.204082	-	0.0803729		-	-	-	-		0.0345682
Leotiomycetes sp. 3360_381	Ascomycota	KJ826793	237	236/240	98		-	0.0820345	-	0.0163159		-	0.204082	-	0.0642983		-	0.0450653	-	0.019972		0.0345682
Archaeorhizomycetes sp. 3360_386	Ascomycota	JQ347010	215	202/215	94		-	0.0820345	-	0.0163159		0.0292056	0.204082	-	0.0803729		-	-	-	-		0.0345682
Agaricomycetes sp. 3360_391	Basidiomycota	KX222980	299	297/300	99		-	-	-	-		0.175234	-	-	0.0964475		-	-	-	-		0.0345682
Agaricomycetes sp. 3360_397	Basidiomycota	KX115947	311	303/311	97		0.0653595	0.328138	-	0.0978953		-	-	-	-		-	-	-	-		0.0345682
Gorgomyces sp. 3360_398	Ascomycota	NR_154062	242	231/243	95		-	-	-	-		-	-	-	-		-	0.225327	-	0.0998602		0.0288068
Xerocomus ferrugineus	Basidiomycota	DQ066398	360	360/361	99		-	-	-	-		-	-	-	-		0.0858001	0.180261	-	0.119832		0.0345682
Dothiora sp. 3360_412	Ascomycota	NR_155059	259	245/260	94		-	-	0.162162	0.0489476		-	-	0.358423	0.0482238		-	-	-	-		0.0345682
Helotiales sp. 3360_418	Ascomycota	JX852359	244	244/244	100		0.163399	0.0820345	-	0.0978953		-	-	-	-		-	-	-	-		0.0345682
Phaeohelotium epiphyllum	Ascomycota	KT876976	240	234/240	98		-	-	-	-		0.116822	-	-	0.0642983		-	0.0450653	-	0.019972		0.0288068
Mortierella parvispora	Mucoromycotina	KU516633	331	331/331	100		0.0653595	-	-	0.0326318		-	0.153061	-	0.0482238		-	0.0450653	-	0.019972		0.0345682
Glomeromycetes sp. 3360_453	Mucoromycotina	FR772327	289	288/289	99		0.0980392	-	-	0.0489476		0.0876168	-	-	0.0482238		-	-	-	-		0.0345682
Helotiales sp. 3360_458	Ascomycota	KY228788	240	227/241	94		-	0.0820345	-	0.0163159		-	0.255102	-	0.0803729		-	-	-	-		0.0345682
Rhytismataceae sp. 3360_460	Ascomycota	FR837916	239	228/241	95		-	-	0.27027	0.0815794		-	-	0.119474	0.0160746		-	-	-	-		0.0345682
Agaricomycetes sp. 3360_492	Basidiomycota	KX115615	320	319/320	99		-	-	-	-		-	0.306122	-	0.0964475		-	-	-	-		0.0345682
Cladophialophora chaetospira	Ascomycota	LC077702	265	264/266	99		0.0326797	-	-	0.0163159		-	-	-	-		0.0429	0.0901307	-	0.0599161		0.0230455
Eurotiomycetes sp. 3360_496	Ascomycota	KP897537	238	234/242	97		-	-	0.324324	0.0978953		-	-	-	-		-	-	-	-		0.0345682
Sordariomycetes sp. 3360_497	Ascomycota	MH452656	256	248/266	93		-	-	-	-		-	0.306122	-	0.0964475		-	-	-	-		0.0345682
Calycina marina	Ascomycota	KT185677	241	232/241	96		-	-	0.216216	0.0652635		-	-	0.119474	0.0160746		-	-	0.218818	0.019972		0.0345682
Helotiales sp. 3360_555	Ascomycota	KT270126	236	234/238	98		-	-	-	-		0.0876168	0.0510204	-	0.0642983		-	0.0450653	-	0.019972		0.0288068
Eurotiomycetes sp. 3360_633	Ascomycota	KJ827128	249	226/250	90		0.0326797	0.164069	-	0.0489476		0.0292056	0.102041	-	0.0482238		-	-	-	-		0.0345682
Archaeorhizomycetes sp. 3360_686	Ascomycota	KT196257	215	209/216	97		-	-	-	-		-	0.102041	-	0.0321492		0.0858001	0.0901307	-	0.0798882		0.0345682
Oidiodendron pilicola	Ascomycota	MG597470	235	229/235	97		0.0653595	0.0820345	-	0.0489476		0.0292056	-	-	0.0160746		0.0429	0.0450653	-	0.0399441		0.0345682
Dothideomycetes sp. 3360_715	Ascomycota	FR682198	242	223/242	92		-	-	0.216216	0.0652635		-	-	0.119474	0.0160746		-	-	0.218818	0.019972		0.0345682
Tetracladium maxilliforme	Ascomycota	KU519119	239	237/239	99		-	-	0.216216	0.0652635		-	-	0.238949	0.0321492		-	-	-	-		0.0345682
Leotiomycetes sp. 3360_754	Ascomycota	KU062190	239	220/242	91		-	-	-	-		0.116822	0.102041	-	0.0964475		-	-	-	-		0.0345682
Eurotiomycetes sp. 3360_773	Ascomycota	MF486314	253	243/253	96		-	-	-	-		-	-	-	-		-	0.270392	-	0.119832		0.0345682
Lycoperdon perlatum	Basidiomycota	KY950489	307	307/308	99		-	0.0820345	-	0.0163159		-	0.0510204	-	0.0160746		-	0.135196	0.218818	0.0798882		0.0345682
Eurotiomycetes sp. 3360_801	Ascomycota	MF486314	254	232/254	91		-	-	-	-		-	-	-	-		-	0.270392	-	0.119832		0.0345682
Meliniomyces variabilis	Ascomycota	EF093173	240	240/241	99		0.130719	-	-	0.0652635		-	-	-	-		-	-	-	-		0.0230455
Botrytis cinerea	Ascomycota	MH329278	239	239/240	99		-	-	-	-		-	0.255102	0.119474	0.0964475		-	-	-	-		0.0345682
Leotiomycetes sp. 3360_1421	Ascomycota	KJ827842	241	239/244	98		0.0326797	-	-	0.0163159		-	-	-	-		0.0429	0.180261	-	0.0998602		0.0345682
Beauveria bassiana	Ascomycota	MH483769	254	253/255	99		-	0.328138	-	0.0652635		-	-	-	-		-	0.0450653	-	0.019972		0.0288068
Eurotiomycetes sp. 3360_290	Ascomycota	HQ022024	248	246/248	99		-	0.0820345	-	0.0163159		-	-	-	-		0.0429	0.135196	-	0.0798882		0.0288068
Agaricomycetes sp. 3360_310	Basidiomycota	HE687089	355	333/360	93		-	-	-	-		-	-	-	-		-	0.0901307	-	0.0399441		0.0115227
Heterobasidion abietinum	Basidiomycota	KT355028	295	295/295	100		-	0.328138	0.0540541	0.0815794		-	-	-	-		-	-	-	-		0.0288068
Cortinarius hinnuleus	Basidiomycota	AY669665	288	288/288	100		-	-	-	-		-	-	-	-		-	0.225327	-	0.0998602		0.0288068
Dactylonectria hordeicola	Ascomycota	MF440368	254	254/255	99		-	-	-	-		0.0876168	0.102041	-	0.0803729		-	-	-	-		0.0288068
Torula herbarum	Ascomycota	MH225772	247	246/247	99		-	-	-	-		-	0.0510204	-	0.0160746		-	0.180261	-	0.0798882		0.0288068
Agaricomycetes sp. 3360_350	Basidiomycota	JN652992	342	307/310	99		-	-	-	-		-	-	-	-		0.1287	0.0901307	-	0.0998602		0.0288068
Agaricomycetes sp. 3360_376	Basidiomycota	GU189680	299	293/299	98		-	-	-	-		-	-	-	-		-	0.225327	-	0.0998602		0.0288068
Helotiales sp. 3360_378	Ascomycota	JX852359	244	238/244	98		-	-	-	-		-	-	-	-		0.1287	0.0901307	-	0.0998602		0.0288068
Agaricomycetes sp. 3360_383	Basidiomycota	KM023223	302	295/302	98		-	-	-	-		0.146028	-	-	0.0803729		-	-	-	-		0.0288068
Leotiomycetes sp. 3360_401	Ascomycota	HQ021837	239	231/239	97		-	-	-	-		-	0.255102	-	0.0803729		-	-	-	-		0.0288068
Eurotiomycetes sp. 3360_407	Ascomycota	JQ346925	262	252/263	96		-	-	-	-		-	0.255102	-	0.0803729		-	-	-	-		0.0288068
Cladophialophora sp. 3360_408	Ascomycota	KF636403	251	248/253	98		0.0653595	0.164069	-	0.0652635		-	-	-	-		-	0.0450653	-	0.019972		0.0288068
Eurotiomycetes sp. 3360_413	Ascomycota	HG936562	281	275/285	96		-	-	-	-		0.0292056	0.204082	-	0.0803729		-	-	-	-		0.0288068
Chaetothyriales sp. 3360_416	Ascomycota	KY228666	275	251/276	91		-	-	-	-		0.146028	-	-	0.0803729		-	-	-	-		0.0288068
Naganishia onofrii	Basidiomycota	MH634709	316	316/316	100		-	-	-	-		-	0.255102	-	0.0803729		-	-	-	-		0.0288068
Trichoderma asperellum	Ascomycota	MH608367	267	267/267	100		-	0.0820345	-	0.0163159		0.0584112	0.0510204	-	0.0482238		-	0.0450653	-	0.019972		0.0288068
Dothideomycetes sp. 3360_428	Ascomycota	KJ188587	233	228/234	100		-	-	-	-		-	-	-	-		-	0.225327	-	0.0998602		0.0288068
Leotiomycetes sp. 3360_432	Ascomycota	GU327457	238	238/238	100		0.0980392	0.0820345	-	0.0652635		0.0292056	-	-	0.0160746		-	-	-	-		0.0288068
Hygrocybe chlorophana	Basidiomycota	JF908052	309	304/309	98		-	-	-	-		-	0.255102	-	0.0803729		-	-	-	-		0.0288068
Hyalodendriella betulae	Ascomycota	NR_156207	239	234/242	97		-	-	-	-		-	-	-	-		0.2145	-	-	0.0998602		0.0288068
Eurotiomycetes sp. 3360_440	Ascomycota	MF486235	248	235/250	94		-	-	-	-		-	0.153061	-	0.0482238		-	0.0901307	-	0.0399441		0.0288068
Helotiales sp. 3360_445	Ascomycota	LC131017	242	242/242	100		0.0326797	0.0820345	-	0.0326318		-	0.0510204	-	0.0160746		-	0.0901307	-	0.0399441		0.0288068
Cryptococcus sp. 3360_446	Basidiomycota	HG324303	322	309/324	95		-	-	0.162162	0.0489476		0.0292056	-	-	0.0160746		-	-	0.218818	0.019972		0.0288068
Phaeotheca fissurella	Ascomycota	KM216356	237	218/220	99		-	-	0.27027	0.0815794		-	-	-	-		-	-	-	-		0.0288068
Lactarius blennius	Basidiomycota	AY606944	359	359/359	100		-	-	-	-		-	-	-	-		0.1716	0.0450653	-	0.0998602		0.0288068
Umbelopsis ramanniana	Mucoromycotina	EU715662	304	302/314	96		-	0.164069	-	0.0326318		-	-	-	-		-	0.135196	-	0.0599161		0.0288068
Tomentellopsis sp. 3360_469	Basidiomycota	HQ533015	312	305/314	97		-	-	-	-		-	-	-	-		0.1287	0.0901307	-	0.0998602		0.0288068
Pezizomycotina sp. 3360_470	Ascomycota	KJ827304	240	240/240	100		-	0.246103	-	0.0489476		-	-	-	-		0.0429	0.0450653	-	0.0399441		0.0288068
Leotiomyceta sp. 3360_471	Ascomycota	KF359573	248	243/249	98		-	-	-	-		-	-	-	-		0.0429	0.180261	-	0.0998602		0.0288068
Pezizomycotina sp. 3360_479	Ascomycota	MF486235	250	243/251	97		-	0.0820345	-	0.0163159		0.0876168	0.0510204	-	0.0642983		-	-	-	-		0.0288068
Leotiomycetes sp. 3360_481	Ascomycota	JQ346977	232	232/239	97		-	-	-	-		-	-	-	-		0.1287	-	-	0.0599161		0.0172841
Inocybe sp. 3360_483	Basidiomycota	FJ904135	287	273/291	94		-	-	-	-		-	-	-	-		-	0.225327	-	0.0998602		0.0288068
Leotiomycetes sp. 3360_491	Ascomycota	KU208067	245	216/247	97		0.0980392	0.164069	-	0.0815794		-	-	-	-		-	-	-	-		0.0288068
Lophodermium sp. 3360_500	Ascomycota	LM654180	240	238/243	98		-	-	0.108108	0.0326318		-	-	0.238949	0.0321492		-	0.0450653	-	0.019972		0.0288068
Tarzetta catinus	Ascomycota	DQ200833	273	273/275	99		-	-	-	-		-	-	-	-		-	0.225327	-	0.0998602		0.0288068
Thelephora terrestris	Basidiomycota	KY693686	312	310/314	99		-	-	-	-		0.0292056	0.0510204	-	0.0321492		-	0.135196	-	0.0599161		0.0288068
Leotiomycetes sp. 3360_514	Ascomycota	KJ826609	249	237/251	94		0.163399	-	-	0.0815794		-	-	-	-		-	-	-	-		0.0288068
Curvibasidium rogersii	Basidiomycota	JX188232	309	309/309	100		-	0.164069	0.0540541	0.0489476		-	-	-	-		-	-	0.437637	0.0399441		0.0288068
Tomentella cinerascens	Basidiomycota	AF272915	316	315/316	99		-	-	-	-		-	-	-	-		0.1716	0.0450653	-	0.0998602		0.0288068
Rickenella fibula	Basidiomycota	MG982530	307	305/307	99		0.163399	-	-	0.0815794		-	-	-	-		-	-	-	-		0.0288068
Leotiomycetes sp. 3360_541	Ascomycota	HM488471	239	235/239	98		-	0.246103	-	0.0489476		0.0292056	-	-	0.0160746		-	0.0450653	-	0.019972		0.0288068
Cladophialophora sp. 3360_551	Ascomycota	AB986416	266	265/268	99		-	-	-	-		0.0876168	0.102041	-	0.0803729		-	-	-	-		0.0288068
Leotiomycetes sp. 3360_569	Ascomycota	HQ022246	242	240/242	99		0.0980392	-	-	0.0489476		-	0.102041	-	0.0321492		-	-	-	-		0.0288068
Archaeorhizomycetes sp. 3360_587	Ascomycota	KJ826637	218	205/218	94		-	-	-	-		-	0.255102	-	0.0803729		-	-	-	-		0.0288068
Leotiomycetes sp. 3360_593	Ascomycota	MF486833	240	239/242	99		-	0.328138	-	0.0652635		-	0.0510204	-	0.0160746		-	-	-	-		0.0288068
Leotiomycetes sp. 3360_596	Ascomycota	FJ554360	241	241/242	99		-	0.246103	-	0.0489476		-	-	-	-		0.0429	0.0450653	-	0.0399441		0.0288068
Tetracladium sp. 3360_599	Ascomycota	KX343162	237	237/238	99		-	-	-	-		0.0876168	0.102041	-	0.0803729		-	-	-	-		0.0288068
Mycena galopus	Basidiomycota	HM240534	305	304/305	99		-	0.0820345	-	0.0163159		0.0876168	0.0510204	-	0.0642983		-	-	-	-		0.0288068
Sordariomycetes sp. 3360_614	Ascomycota	KP891859	284	231/300	77		-	-	0.162162	0.0489476		-	-	0.119474	0.0160746		-	-	0.218818	0.019972		0.0288068
Penicillium simplicissimum	Ascomycota	KM396382	257	257/260	99		0.0980392	0.0820345	-	0.0652635		-	-	-	-		-	0.0450653	-	0.019972		0.0288068
Leohumicola minima	Ascomycota	KY228486	241	235/241	98		-	0.164069	-	0.0326318		-	0.153061	-	0.0482238		-	-	-	-		0.0288068
Dothideomycetes sp. 3360_637	Ascomycota	KJ826807	241	240/241	99		-	0.0820345	-	0.0163159		-	0.0510204	-	0.0160746		0.0429	0.0901307	-	0.0599161		0.0288068
Eurotiomycetes sp. 3360_645	Ascomycota	MH451264	251	248/253	98		-	-	-	-		-	0.204082	-	0.0642983		-	0.0450653	-	0.019972		0.0288068
Helotiales sp. 3360_709	Ascomycota	KY228609	240	228/243	94		0.0980392	0.164069	-	0.0815794		-	-	-	-		-	-	-	-		0.0288068
Trechispora invisitata	Basidiomycota	KP814425	303	295/304	97		-	-	-	-		-	-	-	-		0.0858001	0.135196	-	0.0998602		0.0288068
Neonectria candida	Ascomycota	MH063618	254	254/256	99		-	-	-	-		-	0.102041	-	0.0321492		-	0.135196	-	0.0599161		0.0288068
Leotiomyceta sp. 3360_761	Ascomycota	JQ272351	248	236/248	95		0.0326797	0.164069	-	0.0489476		-	0.102041	-	0.0321492		-	-	-	-		0.0288068
Dothideomycetes sp. 3360_826	Ascomycota	KP891693	240	230/241	95		-	-	0.216216	0.0652635		-	-	-	-		-	-	0.218818	0.019972		0.0288068
Dothideomycetes sp. 3360_841	Ascomycota	AM901764	242	218/246	89		-	-	0.216216	0.0652635		-	-	-	-		-	-	0.218818	0.019972		0.0288068
Capronia sp. 3360_1656	Ascomycota	AY112917	258	256/258	99		-	0.164069	-	0.0326318		-	0.153061	-	0.0482238		-	-	-	-		0.0288068
Lemonniera sp. 3360_288	Ascomycota	KX096679	241	233/241	97		-	-	0.216216	0.0652635		-	-	-	-		-	-	-	-		0.0230455
Entrophospora sp. 3360_325	Mucoromycotina	KJ542310	245	245/249	98		-	-	-	-		-	-	-	-		-	0.0901307	-	0.0399441		0.0115227
Leptodontidium trabinellum	Ascomycota	KY853449	238	236/240	98		-	-	-	-		-	0.153061	-	0.0482238		-	0.0450653	-	0.019972		0.0230455
Lecythophora sp. 3360_340	Ascomycota	KJ735003	245	243/248	98		-	0.0820345	-	0.0163159		-	-	-	-		-	0.135196	-	0.0599161		0.0230455
Mucoromycotina sp. 3360_341	Mucoromycotina	HQ022261	314	310/322	96		-	-	-	-		-	0.204082	-	0.0642983		-	-	-	-		0.0230455
Pezizomycotina sp. 3360_349	Ascomycota	MH451826	260	259/260	99		-	0.0820345	-	0.0163159		0.0292056	0.102041	-	0.0482238		-	-	-	-		0.0230455
Leotiomycetes sp. 3360_352	Ascomycota	MF405784	242	244/283	86		-	-	-	-		-	-	-	-		-	0.135196	-	0.0599161		0.0172841
Pezizomycetes sp. 3360_354	Ascomycota	KY687549	279	368/375	98		-	-	-	-		-	-	-	-		0.1716	-	-	0.0798882		0.0230455
Sebacina epigaea	Basidiomycota	KF000427	294	294/294	100		-	-	-	-		0.0584112	0.102041	-	0.0642983		-	-	-	-		0.0230455
Pezizomycotina sp. 3360_368	Ascomycota	MH450646	238	232/241	96		-	0.0820345	-	0.0163159		-	-	-	-		-	0.135196	-	0.0599161		0.0230455
Eurotiomycetes sp. 3360_371	Ascomycota	HQ022301	254	243/262	93		-	-	-	-		-	0.204082	-	0.0642983		-	-	-	-		0.0230455
Galerina sideroides	Basidiomycota	KT008365	297	293/306	96		-	0.328138	-	0.0652635		-	-	-	-		-	-	-	-		0.0230455
Mucoromycotina sp. 3360_402	Mucoromycotina	KX222765	288	273/314	87		-	-	-	-		-	0.102041	-	0.0321492		-	0.0901307	-	0.0399441		0.0230455
Eurotiomycetes sp. 3360_403	Ascomycota	HQ022171	256	248/259	96		0.130719	-	-	0.0652635		-	-	-	-		-	-	-	-		0.0230455
Penicillium alogum	Ascomycota	KT887869	257	254/260	98		0.0326797	-	-	0.0163159		-	0.153061	-	0.0482238		-	-	-	-		0.0230455
Mortierella fluviae	Mucoromycotina	KX227756	341	339/342	99		-	-	-	-		0.0584112	0.102041	-	0.0642983		-	-	-	-		0.0230455
Entoloma sericeum	Basidiomycota	KY706153	299	299/301	99		-	-	-	-		-	0.204082	-	0.0642983		-	-	-	-		0.0230455
Agaricomycetes sp. 3360_431	Basidiomycota	HQ154277	298	289/298	97		0.130719	-	-	0.0652635		-	-	-	-		-	-	-	-		0.0230455
Agaricomycetes sp. 3360_443	Basidiomycota	KX115853	316	294/326	90		-	0.328138	-	0.0652635		-	-	-	-		-	-	-	-		0.0230455
Mucoromycotina sp. 3360_456	Mucoromycotina	JX316327	343	342/343	99		0.0326797	-	-	0.0163159		-	-	-	-		-	0.135196	-	0.0599161		0.0230455
Dothideomycetes sp. 3360_463	Ascomycota	EF434104	240	232/242	96		-	-	-	-		-	0.204082	-	0.0642983		-	-	-	-		0.0230455
Mucoromycotina sp. 3360_465	Mucoromycotina	KX193024	352	348/352	99		-	-	-	-		-	-	-	-		-	0.180261	-	0.0798882		0.0230455
Agaricomycetes sp. 3360_480	Basidiomycota	HQ154278	304	280/306	92		-	-	-	-		-	0.204082	-	0.0642983		-	-	-	-		0.0230455
Tomentella sp. 3360_482	Basidiomycota	KT275628	312	304/314	97		-	-	-	-		0.0876168	0.0510204	-	0.0642983		-	-	-	-		0.0230455
Hygrocybe spadicea	Basidiomycota	KF291201	323	321/326	98		-	-	-	-		0.0292056	0.153061	-	0.0642983		-	-	-	-		0.0230455
Ascomycota sp. 3360_487	Ascomycota	FN435802	272	236/243	97		-	-	0.216216	0.0652635		-	-	-	-		-	-	-	-		0.0230455
Leotiomycetes sp. 3360_489	Ascomycota	MF486962	237	235/240	98		-	0.0820345	-	0.0163159		-	-	-	-		-	0.135196	-	0.0599161		0.0230455
Pleosporales sp. 3360_493	Ascomycota	KR187108	222	209/233	90		-	-	-	-		-	-	0.477897	0.0642983		-	-	-	-		0.0230455
Leotiomycetes sp. 3360_501	Ascomycota	HQ021922	240	231/242	95		-	-	-	-		-	0.204082	-	0.0642983		-	-	-	-		0.0230455
Coprinellus micaceus	Basidiomycota	MH562051	296	295/298	99		-	-	-	-		-	-	-	-		-	0.180261	-	0.0798882		0.0230455
Tomentella sp. 3360_506	Basidiomycota	KT275628	314	300/316	95		-	-	-	-		0.116822	-	-	0.0642983		-	-	-	-		0.0230455
Agaricomycetes sp. 3360_517	Basidiomycota	KT273808	281	280/281	99		-	-	-	-		0.0876168	0.0510204	-	0.0642983		-	-	-	-		0.0230455
Sepedonium chrysospermum	Ascomycota	KT946851	262	261/266	98		-	-	-	-		-	-	-	-		-	0.180261	-	0.0798882		0.0230455
Lecythophora sp. 3360_527	Ascomycota	MF062193	251	250/251	99		-	-	-	-		0.0292056	0.153061	-	0.0642983		-	-	-	-		0.0230455
Archaeospora leptoticha	Mucoromycotina	AJ567807	288	283/295	96		-	-	-	-		-	-	-	-		-	0.180261	-	0.0798882		0.0230455
Dothideomycetes sp. 3360_535	Ascomycota	FR682198	240	225/243	93		-	-	0.216216	0.0652635		-	-	-	-		-	-	-	-		0.0230455
Eurotiomycetes sp. 3360_542	Ascomycota	KJ828664	255	250/258	97		-	-	-	-		-	0.153061	-	0.0482238		-	0.0450653	-	0.019972		0.0230455
Eurotiomycetes sp. 3360_561	Ascomycota	MH452116	261	248/261	95		-	-	-	-		-	0.204082	-	0.0642983		-	-	-	-		0.0230455
Pezicula ericae	Ascomycota	KY979197	239	239/241	99		0.0326797	-	-	0.0163159		0.0292056	0.102041	-	0.0482238		-	-	-	-		0.0230455
Eurotiomycetes sp. 3360_572	Ascomycota	KJ826709	253	252/255	99		-	-	-	-		-	-	-	-		0.0429	0.135196	-	0.0798882		0.0230455
Infundichalara microchona	Ascomycota	NR_154074	239	234/241	99		0.0653595	-	-	0.0326318		-	-	-	-		0.0858001	-	-	0.0399441		0.0230455
Archaeorhizomycetes sp. 3360_578	Ascomycota	KU064046	211	211/211	100		-	-	-	-		-	-	-	-		0.1716	-	-	0.0798882		0.0230455
Eurotiomycetes sp. 3360_579	Ascomycota	MH451155	258	255/258	99		-	-	-	-		0.116822	-	-	0.0642983		-	-	-	-		0.0230455
Sarcinomyces sp. 3360_600	Ascomycota	KU057815	251	251/255	98		0.130719	-	-	0.0652635		-	-	-	-		-	-	-	-		0.0230455
Helotiales sp. 3360_603	Ascomycota	KY228554	240	230/241	95		-	-	-	-		0.116822	-	-	0.0642983		-	-	-	-		0.0230455
Dothideomycetes sp. 3360_609	Ascomycota	KR266735	237	230/239	96		-	-	0.108108	0.0326318		-	-	0.119474	0.0160746		-	-	0.218818	0.019972		0.0230455
Leotiomycetes sp. 3360_611	Ascomycota	FJ827174	243	243/243	100		0.0653595	-	-	0.0326318		0.0584112	-	-	0.0321492		-	-	-	-		0.0230455
Mortierella macrocystis	Mucoromycotina	JQ272448	330	329/330	99		-	-	-	-		0.0584112	-	-	0.0321492		-	0.0901307	-	0.0399441		0.0230455
Dothideomycetes sp. 3360_615	Ascomycota	HM488599	235	231/236	98		-	0.246103	-	0.0489476		-	-	-	-		0.0429	-	-	0.019972		0.0230455
Dothideomycetes sp. 3360_625	Ascomycota	MF486985	236	231/239	97		-	-	-	-		-	-	-	-		-	0.180261	-	0.0798882		0.0230455
Hyaloscypha aureliella	Ascomycota	AB546942	237	228/237	96		0.0980392	0.0820345	-	0.0652635		-	-	-	-		-	-	-	-		0.0230455
Rhizopogon cf. salebrosus	Basidiomycota	KJ595008	345	337/345	98		0.0980392	-	-	0.0489476		0.0292056	-	-	0.0160746		-	-	-	-		0.0230455
Scytalidium album	Ascomycota	MF992676	231	229/241	95		-	-	-	-		-	-	-	-		-	0.180261	-	0.0798882		0.0230455
Leotiomycetes sp. 3360_638	Ascomycota	KF617439	233	227/237	96		-	-	-	-		-	-	-	-		0.1287	0.0450653	-	0.0798882		0.0230455
Eurotiomycetes sp. 3360_643	Ascomycota	MH450344	281	281/281	100		-	-	-	-		0.116822	-	-	0.0642983		-	-	-	-		0.0230455
Dothideomycetes sp. 3360_655	Ascomycota	KJ827642	232	224/241	93		-	0.328138	-	0.0652635		-	-	-	-		-	-	-	-		0.0230455
Eurotiomycetes sp. 3360_660	Ascomycota	KJ827128	249	245/249	98		-	0.328138	-	0.0652635		-	-	-	-		-	-	-	-		0.0230455
Cladophialophora sp. 3360_662	Ascomycota	KY228825	265	264/266	99		0.0326797	0.0820345	-	0.0326318		-	-	-	-		0.0429	0.0450653	-	0.0399441		0.0230455
Helotiales sp. 3360_664	Ascomycota	EF093149	239	236/241	98		-	0.0820345	-	0.0163159		-	-	-	-		-	0.135196	-	0.0599161		0.0230455
Exobasidiomycetes sp. 3360_680	Basidiomycota	EU784219	271	269/294	91		-	-	0.216216	0.0652635		-	-	-	-		-	-	-	-		0.0230455
Archaeorhizomycetes sp. 3360_689	Ascomycota	FJ440863	214	207/214	97		-	-	-	-		0.0292056	0.153061	-	0.0642983		-	-	-	-		0.0230455
Mycena cinerella	Basidiomycota	KT900146	298	298/308	97		0.0980392	-	-	0.0489476		-	0.0510204	-	0.0160746		-	-	-	-		0.0230455
Mucoromycotina sp. 3360_724	Mucoromycotina	MF482006	347	341/350	97		-	-	-	-		0.0292056	0.102041	-	0.0482238		-	0.0450653	-	0.019972		0.0230455
Aureobasidium subglaciale	Ascomycota	MF001328	242	242/250	97		0.0326797	-	-	0.0163159		0.0584112	0.0510204	-	0.0482238		-	-	-	-		0.0230455
Hodophilus sp. 3360_734	Basidiomycota	KP257170	306	294/307	96		-	-	-	-		-	0.204082	-	0.0642983		-	-	-	-		0.0230455
Phomopsis columnaris	Ascomycota	KX610405	247	246/250	98		-	0.246103	-	0.0489476		0.0292056	-	-	0.0160746		-	-	-	-		0.0230455
Dothideomycetes sp. 3360_774	Ascomycota	KC243967	232	220/233	94		-	-	-	-		0.116822	-	-	0.0642983		-	-	-	-		0.0230455
Leotiomycetes sp. 3360_791	Ascomycota	KR266546	235	220/239	92		-	-	-	-		-	-	-	-		-	0.180261	-	0.0798882		0.0230455
Dothideomycetes sp. 3360_793	Ascomycota	KJ827863	248	234/250	94		-	-	-	-		-	-	-	-		-	-	0.875274	0.0798882		0.0230455
Hygrocybe konradii var. konradii	Basidiomycota	JF908058	313	308/313	98		-	-	-	-		-	0.204082	-	0.0642983		-	-	-	-		0.0230455
Mortierella amoeboidea	Mucoromycotina	GU559984	339	339/339	100		-	-	-	-		-	-	-	-		-	0.180261	-	0.0798882		0.0230455
Dothideomycetes sp. 3360_797	Ascomycota	KJ827292	239	229/242	95		-	-	0.162162	0.0489476		-	-	0.119474	0.0160746		-	-	-	-		0.0230455
Mortierella gamsii	Mucoromycotina	AJ878508	330	324/332	98		0.0653595	-	-	0.0326318		0.0292056	0.0510204	-	0.0321492		-	-	-	-		0.0230455
Mucoromycotina sp. 3360_817	Mucoromycotina	KR265941	327	307/319	96		-	-	-	-		-	0.153061	-	0.0482238		-	-	-	-		0.0172841
Herpotrichiellaceae sp. 3360_827	Ascomycota	AB847033	261	233/271	86		-	-	-	-		0.0876168	0.0510204	-	0.0642983		-	-	-	-		0.0230455
Trichoderma harzianum	Ascomycota	MF408543	271	271/271	100		0.0980392	-	-	0.0489476		0.0292056	-	-	0.0160746		-	-	-	-		0.0230455
Bannozyma sp. 3360_834	Basidiomycota	KY558343	301	301/302	99		-	-	0.216216	0.0652635		-	-	-	-		-	-	-	-		0.0230455
Penicillium nothofagi	Ascomycota	KY558626	260	260/260	100		0.0326797	0.164069	-	0.0489476		-	0.0510204	-	0.0160746		-	-	-	-		0.0230455
Helotiales sp. 3360_863	Ascomycota	JX001635	240	233/240	97		-	-	-	-		-	0.0510204	-	0.0160746		-	0.135196	-	0.0599161		0.0230455
Hyaloscyphaceae sp. 3360_875	Ascomycota	JX852344	238	231/240	96		-	-	-	-		-	-	-	-		0.1716	-	-	0.0798882		0.0230455
Metapochonia bulbillosa	Ascomycota	MH483845	277	277/279	99		0.130719	-	-	0.0652635		-	-	-	-		-	-	-	-		0.0230455
Dothideomycetes sp. 3360_895	Ascomycota	MF487022	238	226/238	95		0.0326797	0.246103	-	0.0652635		-	-	-	-		-	-	-	-		0.0230455
Eurotiomycetes sp. 3360_2200	Ascomycota	EU624333	265	263/270	97		-	-	-	-		-	-	-	-		0.1287	0.0450653	-	0.0798882		0.0230455
Spirosphaera sp. 3360_2353	Ascomycota	EF029215	241	232/242	96		0.0326797	-	-	0.0163159		-	-	-	-		0.1287	-	-	0.0599161		0.0230455
Alatospora sp. 3360_343	Ascomycota	KF730798	232	231/240	96		-	0.0820345	-	0.0163159		-	0.102041	-	0.0321492		-	-	-	-		0.0172841
Microbotryomycetes sp. 3360_346	Basidiomycota	HG936309	300	261/311	84		-	-	0.108108	0.0326318		-	-	-	-		-	-	0.218818	0.019972		0.0172841
Endoconidioma populi	Ascomycota	KX611029	257	253/257	98		-	-	0.0540541	0.0163159		-	-	0.238949	0.0321492		-	-	-	-		0.0172841
Chaetothyriales sp. 3360_365	Ascomycota	KY228796	263	259/264	98		-	-	-	-		0.0292056	-	-	0.0160746		0.0429	0.0450653	-	0.0399441		0.0172841
Eurotiomycetes sp. 3360_374	Ascomycota	KJ826974	248	241/248	97		-	-	-	-		-	-	-	-		-	0.135196	-	0.0599161		0.0172841
Agaricomycetes sp. 3360_384	Basidiomycota	HM044549	311	310/315	98		-	-	-	-		-	-	-	-		-	0.135196	-	0.0599161		0.0172841
Helotiales sp. 3360_393	Ascomycota	KT268583	239	234/239	98		0.0326797	-	-	0.0163159		-	-	-	-		-	0.0450653	-	0.019972		0.0115227
Chaetothyriales sp. 3360_405	Ascomycota	KY228527	253	242/257	94		0.0326797	-	-	0.0163159		0.0584112	-	-	0.0321492		-	-	-	-		0.0172841
Leotiomycetes sp. 3360_409	Ascomycota	FR846475	238	227/242	94		0.0326797	0.0820345	-	0.0326318		-	-	-	-		0.0429	-	-	0.019972		0.0172841
Flagellospora leucorhynchos	Ascomycota	KC834049	239	233/241	97		-	-	-	-		0.0876168	-	-	0.0482238		-	-	-	-		0.0172841
Leotiomycetes sp. 3360_426	Ascomycota	MH447081	240	227/241	94		-	-	-	-		-	-	-	-		-	-	0.656455	0.0599161		0.0172841
Lecanoromycetes sp. 3360_430	Ascomycota	KR266636	245	228/248	92		0.0653595	-	-	0.0326318		-	0.0510204	-	0.0160746		-	-	-	-		0.0172841
Oidiodendron sp. 3360_444	Ascomycota	KX640642	234	227/235	97		-	-	-	-		0.0292056	0.102041	-	0.0482238		-	-	-	-		0.0172841
Helotiales sp. E3360_451	Ascomycota	LC131010	242	241/242	99		-	0.164069	-	0.0326318		-	-	-	-		-	0.0450653	-	0.019972		0.0172841
Ramularia vizellae	Ascomycota	NR_154914	236	236/237	99		-	-	-	-		-	-	-	-		-	0.135196	-	0.0599161		0.0172841
Leotiomycetes sp. 3360_457	Ascomycota	JF449786	234	233/237	98		-	-	-	-		-	-	-	-		-	0.135196	-	0.0599161		0.0172841
Umbelopsis sp. 3360_462	Mucoromycotina	KT354998	294	279/294	95		-	-	-	-		0.0292056	0.102041	-	0.0482238		-	-	-	-		0.0172841
Curvibasidium sp. 3360_473	Basidiomycota	JX188232	308	298/309	96		-	-	-	-		-	-	-	-		-	-	0.656455	0.0599161		0.0172841
Lachnum sp. 3360_476	Ascomycota	MH633930	237	231/238	97		0.0326797	0.164069	-	0.0489476		-	-	-	-		-	-	-	-		0.0172841
Agaricomycetes sp. 3360_499	Basidiomycota	JF440568	327	282/290	97		-	-	0.0540541	0.0163159		-	-	0.238949	0.0321492		-	-	-	-		0.0172841
Cordyceps confragosa	Ascomycota	MH400797	255	255/255	100		0.0653595	-	-	0.0326318		-	-	-	-		0.0429	-	-	0.019972		0.0172841
Agaricomycetes sp. 3360_510	Basidiomycota	HQ154242	310	302/313	96		-	-	-	-		-	0.0510204	-	0.0160746		-	0.0901307	-	0.0399441		0.0172841
Agaricomycetes sp. 3360_511	Basidiomycota	FR750673	297	287/298	96		-	0.0820345	-	0.0163159		-	0.102041	-	0.0321492		-	-	-	-		0.0172841
Agaricomycetes sp. 3360_516	Basidiomycota	JF519107	301	299/304	98		-	-	-	-		-	0.153061	-	0.0482238		-	-	-	-		0.0172841
Lecanoromycetes sp. 3360_525	Ascomycota	MH450782	250	249/256	97		0.0326797	-	-	0.0163159		0.0292056	0.0510204	-	0.0321492		-	-	-	-		0.0172841
Umbelopsis ramanniana	Mucoromycotina	AB193542	314	313/315	99		0.0326797	0.164069	-	0.0489476		-	-	-	-		-	-	-	-		0.0172841
Alternaria infectoria	Ascomycota	MG978343	253	252/253	99		-	-	-	-		-	0.153061	-	0.0482238		-	-	-	-		0.0172841
Eurotiomycetes sp. 3360_536	Ascomycota	MF485821	258	246/262	94		-	-	-	-		0.0876168	-	-	0.0482238		-	-	-	-		0.0172841
Capronia sp. 3360_545	Ascomycota	EU139148	255	239/256	91		-	-	-	-		-	-	-	-		-	-	0.656455	0.0599161		0.0172841
Dothideomycetes sp. 3360_548	Ascomycota	MF569914	243	226/243	93		-	0.0820345	-	0.0163159		-	0.102041	-	0.0321492		-	-	-	-		0.0172841
Dothideomycetes sp. 3360_549	Ascomycota	KP897537	243	227/244	93		-	-	0.108108	0.0326318		-	-	-	-		-	-	0.218818	0.019972		0.0172841
Humicola fuscoatra	Ascomycota	KX976675	246	245/246	99		-	-	-	-		-	-	-	-		-	0.135196	-	0.0599161		0.0172841
Bannozyma yamatoana	Basidiomycota	AF444634	301	297/301	99		-	-	0.0540541	0.0163159		-	-	0.238949	0.0321492		-	-	-	-		0.0172841
Leotiomycetes sp. 3360_568	Ascomycota	KX403772	239	198/200	99		-	-	-	-		-	-	-	-		-	0.135196	-	0.0599161		0.0172841
Leotiomycetes sp. 3360_580	Ascomycota	JQ256424	249	230/251	92		-	0.246103	-	0.0489476		-	-	-	-		-	-	-	-		0.0172841
Microbotryomycetes sp. 3360_583	Basidiomycota	LT608083	319	316/324	98		-	-	-	-		-	0.0510204	-	0.0160746		-	0.0901307	-	0.0399441		0.0172841
Pezizaceae sp. 3360_589	Ascomycota	KM576471	278	278/279	99		-	-	-	-		-	-	-	-		-	0.135196	-	0.0599161		0.0172841
Leotiomycetes sp. 3360_591	Ascomycota	MF486932	239	232/239	97		-	0.246103	-	0.0489476		-	-	-	-		-	-	-	-		0.0172841
Agaricomycetes sp. 3360_592	Basidiomycota	GU180308	300	290/301	96		-	-	-	-		0.0584112	0.0510204	-	0.0482238		-	-	-	-		0.0172841
Leotiomycetes sp. 3360_597	Ascomycota	KU062752	239	229/240	95		-	-	-	-		-	-	-	-		-	0.135196	-	0.0599161		0.0172841
Lepista sordida	Basidiomycota	JQ293096	298	297/300	99		-	-	-	-		-	0.153061	-	0.0482238		-	-	-	-		0.0172841
Leotiomycetes sp. 3360_606	Ascomycota	KC966259	228	227/240	95		-	0.0820345	-	0.0163159		-	-	-	-		-	0.0901307	-	0.0399441		0.0172841
Peniophora sp. 3360_608	Ascomycota	HQ608100	238	234/243	96		0.0653595	0.0820345	-	0.0489476		-	-	-	-		-	-	-	-		0.0172841
Taphrina sp. 3360_610	Ascomycota	LT602860	295	293/295	99		-	-	-	-		-	0.0510204	0.238949	0.0482238		-	-	-	-		0.0172841
Mycosphaerellaceae sp. 3360_616	Ascomycota	JF764806	238	227/248	92		-	-	0.108108	0.0326318		-	-	0.119474	0.0160746		-	-	-	-		0.0172841
Mortierella sp. 3360_618	Mucoromycotina	KM357302	289	282/295	96		-	-	-	-		-	-	-	-		0.0429	0.0901307	-	0.0599161		0.0172841
Cyphellophora sp. 3360_621	Ascomycota	KY987519	261	259/262	99		-	-	-	-		0.0292056	0.102041	-	0.0482238		-	-	-	-		0.0172841
Infundichalara microchona	Ascomycota	NR_154074	239	231/239	97		-	-	0.0540541	0.0163159		-	-	0.238949	0.0321492		-	-	-	-		0.0172841
Agaricomycetes sp. 3360_636	Ascomycota	KU975468	299	273/301	91		-	-	-	-		0.0292056	0.102041	-	0.0482238		-	-	-	-		0.0172841
Inocybe subnudipes	Basidiomycota	AM882983	297	254/259	98		-	-	-	-		-	-	-	-		-	0.135196	-	0.0599161		0.0172841
Leotiomycetes sp. 3360_650	Ascomycota	FR682186	248	239/250	96		-	-	0.108108	0.0326318		-	-	0.119474	0.0160746		-	-	-	-		0.0172841
Agaricomycetes sp. 3360_651	Basidiomycota	FJ440936	295	289/297	97		-	-	-	-		-	-	-	-		0.0429	0.0901307	-	0.0599161		0.0172841
Stereaceae sp. 3360_663	Basidiomycota	FR846481	301	297/301	99		-	-	-	-		-	-	-	-		0.1287	-	-	0.0599161		0.0172841
Dothideomycetes sp. 3360_667	Ascomycota	KX909214	251	251/251	100		0.0326797	-	0.0540541	0.0326318		-	-	-	-		0.0429	-	-	0.019972		0.0172841
Dothideomycetes sp. 3360_669	Ascomycota	MH450823	229	228/230	99		-	-	-	-		0.0876168	-	-	0.0482238		-	-	-	-		0.0172841
Microbotryomycetes sp. 3360_672	Basidiomycota	HQ022074	303	292/303	96		0.0326797	-	-	0.0163159		0.0292056	0.0510204	-	0.0321492		-	-	-	-		0.0172841
Helotiales sp. 3360_687	Ascomycota	JN655578	238	237/239	99		0.0326797	0.164069	-	0.0489476		-	-	-	-		-	-	-	-		0.0172841
Agaricomycetes sp. 3360_693	Basidiomycota	KY706174	309	293/314	93		0.0326797	0.164069	-	0.0489476		-	-	-	-		-	-	-	-		0.0172841
Eurotiomycetes sp. 3360_698	Ascomycota	MH450451	255	239/257	93		-	-	-	-		-	-	-	-		-	0.135196	-	0.0599161		0.0172841
Leotiomycetes sp. 3360_720	Ascomycota	KJ827050	237	220/240	92		-	-	-	-		-	0.153061	-	0.0482238		-	-	-	-		0.0172841
Leotiomycetes sp. 3360_722	Ascomycota	KX221952	243	240/244	98		-	-	-	-		-	-	-	-		-	0.135196	-	0.0599161		0.0172841
Agaricomycetes sp. 3360_723	Basidiomycota	FJ196937	311	288/318	91		-	-	-	-		-	-	-	-		0.1287	-	-	0.0599161		0.0172841
Dicranophora sp. 3360_728	Mucoromycotina	KT736107	272	246/261	94		-	-	-	-		0.0292056	0.102041	-	0.0482238		-	-	-	-		0.0172841
Leotiomycetes sp. 3360_735	Ascomycota	FJ554315	237	234/237	99		-	-	0.108108	0.0326318		-	-	-	-		0.0429	-	-	0.019972		0.0172841
Flagellospora sp. 3360_739	Ascomycota	KC834048	242	232/243	95		-	-	-	-		-	-	-	-		-	0.135196	-	0.0599161		0.0172841
Sordariomycetes sp. 3360_747	Ascomycota	KJ827420	241	231/241	96		-	-	-	-		-	-	-	-		-	0.135196	-	0.0599161		0.0172841
Byssocorticium sp. 3360_753	Basidiomycota	KY611395	288	284/288	99		-	-	-	-		-	-	-	-		-	0.135196	-	0.0599161		0.0172841
Gorgomyces sp. 3360_760	Ascomycota	NR_154062	242	233/243	96		-	0.0820345	-	0.0163159		-	-	-	-		0.0429	-	-	0.019972		0.0115227
Phaeomoniella sp. 3360_771	Ascomycota	JN225892	258	257/260	99		-	-	-	-		-	-	-	-		-	-	0.656455	0.0599161		0.0172841
Gyoerffyella rotula	Ascomycota	KU516477	241	240/241	99		0.0980392	-	-	0.0489476		-	-	-	-		-	-	-	-		0.0172841
Archaeorhizomycetes sp. 3360_779	Ascomycota	JQ347010	215	204/215	95		0.0326797	-	-	0.0163159		-	-	-	-		-	0.0901307	-	0.0399441		0.0172841
Eurotiomycetes sp. 3360_780	Ascomycota	AM902038	256	255/256	99		-	-	0.162162	0.0489476		-	-	-	-		-	-	-	-		0.0172841
Agaricomycetes sp. 3360_782	Basidiomycota	KX115651	303	287/312	92		-	-	-	-		-	0.153061	-	0.0482238		-	-	-	-		0.0172841
Pseudeurotium sp. 3360_784	Ascomycota	KY432737	239	232/241	96		-	0.164069	-	0.0326318		0.0292056	-	-	0.0160746		-	-	-	-		0.0172841
Xenopolyscytalum pinea	Ascomycota	NR_156543	240	238/240	99		-	-	-	-		-	0.0510204	-	0.0160746		0.0429	0.0450653	-	0.0399441		0.0172841
Taphrina sp. 3360_794	Ascomycota	NR_155877	296	286/301	95		-	-	0.0540541	0.0163159		-	-	0.238949	0.0321492		-	-	-	-		0.0172841
Sordariomycetes sp. 3360_798	Ascomycota	HQ022030	285	284/286	99		-	-	-	-		0.0292056	0.102041	-	0.0482238		-	-	-	-		0.0172841
Dothideomycetes sp. 3360_802	Ascomycota	KF297155	273	250/274	91		-	0.246103	-	0.0489476		-	-	-	-		-	-	-	-		0.0172841
Microbotryomycetes sp. 3360_803	Basidiomycota	KU948755	288	275/287	96		-	-	0.162162	0.0489476		-	-	-	-		-	-	-	-		0.0172841
Neophaeococcomyces aloes	Ascomycota	NR_132069	289	285/291	98		-	-	-	-		-	0.153061	-	0.0482238		-	-	-	-		0.0172841
Cystobasidiomycetes sp. 3360_814	Basidiomycota	KU948766	290	264/269	98		0.0980392	-	-	0.0489476		-	-	-	-		-	-	-	-		0.0172841
Clavaria flavostellifera	Basidiomycota	KC759466	312	310/312	99		-	-	-	-		-	0.153061	-	0.0482238		-	-	-	-		0.0172841
Piloderma sp. 3360_823	Ascomycota	KU924571	262	241/285	85		-	-	-	-		-	-	-	-		0.0429	0.0901307	-	0.0599161		0.0172841
Dothideomycetes sp. 3360_829	Ascomycota	KJ008860	233	233/234	99		-	-	-	-		-	-	-	-		0.0429	0.0901307	-	0.0599161		0.0172841
Eurotiomycetes sp. 3360_852	Ascomycota	MH451802	256	247/256	96		0.0326797	0.0820345	-	0.0326318		-	0.0510204	-	0.0160746		-	-	-	-		0.0172841
Lecanoromycetes sp. 3360_858	Ascomycota	KM493896	246	236/247	96		-	-	0.162162	0.0489476		-	-	-	-		-	-	-	-		0.0172841
Leotiomycetes sp. 3360_860	Ascomycota	FJ553969	236	235/238	99		-	-	-	-		0.0876168	-	-	0.0482238		-	-	-	-		0.0172841
Eurotiomycetes sp. 3360_861	Ascomycota	MH451802	256	251/256	98		-	0.246103	-	0.0489476		-	-	-	-		-	-	-	-		0.0172841
Lecanoromycetes sp. 3360_866	Ascomycota	KP887850	260	206/262	79		0.0326797	-	-	0.0163159		-	0.102041	-	0.0321492		-	-	-	-		0.0172841
Neonectria major	Ascomycota	MF326629	260	249/256	97		-	-	-	-		-	0.102041	-	0.0321492		-	0.0450653	-	0.019972		0.0172841
Cladophialophora sp. 3360_884	Ascomycota	EU139144	253	249/256	97		-	-	-	-		-	-	-	-		0.0858001	0.0450653	-	0.0599161		0.0172841
Leptobacillium leptobactrum	Ascomycota	NR_154111	282	279/283	99		-	-	-	-		-	-	-	-		0.0858001	0.0450653	-	0.0599161		0.0172841
Leotiomycetes sp. 3360_910	Ascomycota	JF449671	239	235/241	98		-	-	0.108108	0.0326318		-	-	-	-		-	-	0.218818	0.019972		0.0172841
Oidiodendron sp. 3360_915	Ascomycota	KU208023	235	234/235	99		-	0.0820345	-	0.0163159		-	-	-	-		-	0.0901307	-	0.0399441		0.0172841
Chaetothyriales sp. 3360_924	Ascomycota	KY228720	257	246/258	95		-	-	-	-		0.0876168	-	-	0.0482238		-	-	-	-		0.0172841
Dothideomycetes sp. 3360_988	Ascomycota	KR266784	233	233/234	99		-	-	-	-		-	0.153061	-	0.0482238		-	-	-	-		0.0172841
Cladophialophora sp. 3360_1009	Ascomycota	KF636403	252	247/253	98		-	-	-	-		-	-	-	-		0.0429	0.0901307	-	0.0599161		0.0172841
Phialocephala sp. 3360_1502	Ascomycota	JN995647	268	252/262	96		0.0326797	-	-	0.0163159		0.0584112	-	-	0.0321492		-	-	-	-		0.0172841
Byssocorticium sp. 3360_1645	Basidiomycota	KM576308	291	291/291	100		-	-	-	-		-	-	-	-		-	0.135196	-	0.0599161		0.0172841
Dothideomycetes sp. 3360_1911	Ascomycota	KJ827592	250	244/251	97		-	-	-	-		-	-	-	-		0.0429	0.0901307	-	0.0599161		0.0172841
Eurotiomycetes sp. 3360_2189	Ascomycota	KX116035	249	234/252	93		-	0.0820345	-	0.0163159		-	0.102041	-	0.0321492		-	-	-	-		0.0172841
Sordariomycetes sp. 3360_2429	Ascomycota	MF665007	238	199/200	99		-	-	-	-		-	-	-	-		0.0429	-	-	0.019972		0.00576136
Leotiomyceta sp. 3360_505	Ascomycota	JQ272350	264	250/264	95		-	-	-	-		-	0.102041	-	0.0321492		-	-	-	-		0.0115227
Phialocephala sp. 3360_512	Ascomycota	KJ817289	240	240/240	100		-	0.164069	-	0.0326318		-	-	-	-		-	-	-	-		0.0115227
Pleosporales sp. 3360_515	Ascomycota	MH633944	246	200/200	100		-	0.0820345	-	0.0163159		0.0292056	-	-	0.0160746		-	-	-	-		0.0115227
Seimatosporium hypericinum	Ascomycota	AB594805	240	240/248	97		-	0.164069	-	0.0326318		-	-	-	-		-	-	-	-		0.0115227
Sporidiobolales sp. 3360_528	Basidiomycota	KY228575	296	294/299	98		-	-	0.0540541	0.0163159		-	-	-	-		-	-	0.218818	0.019972		0.0115227
Juncaceicola alpina	Ascomycota	NR_145172	248	243/244	99		-	-	0.108108	0.0326318		-	-	-	-		-	-	-	-		0.0115227
Cystobasidium sp. 3360_532	Basidiomycota	LC272874	296	294/297	99		-	-	-	-		-	0.102041	-	0.0321492		-	-	-	-		0.0115227
Trichoglossum walteri	Ascomycota	JQ256430	302	298/305	98		0.0653595	-	-	0.0326318		-	-	-	-		-	-	-	-		0.0115227
Hyaloscyphaceae sp. 3360_546	Ascomycota	JX852344	238	236/240	98		0.0653595	-	-	0.0326318		-	-	-	-		-	-	-	-		0.0115227
Leohumicola minima	Ascomycota	KY228486	240	234/241	97		-	-	-	-		-	0.102041	-	0.0321492		-	-	-	-		0.0115227
Agaricomycetes sp. 3360_553	Basidiomycota	KF291133	289	279/301	93		-	-	-	-		0.0292056	0.0510204	-	0.0321492		-	-	-	-		0.0115227
Leotiomycetes sp. 3360_556	Ascomycota	KJ827355	241	232/241	96		-	-	-	-		-	-	-	-		-	0.0901307	-	0.0399441		0.0115227
Mycena silvae-nigrae	Basidiomycota	KF359604	307	307/307	100		0.0653595	-	-	0.0326318		-	-	-	-		-	-	-	-		0.0115227
Leotiomycetes sp. 3360_559	Ascomycota	EU754979	239	239/240	99		-	-	-	-		-	-	-	-		-	0.0901307	-	0.0399441		0.0115227
Cladophialophora sp. 3360_560	Ascomycota	MG597448	252	243/253	96		0.0326797	-	-	0.0163159		-	-	-	-		0.0429	-	-	0.019972		0.0115227
Microbotryomycetes sp. 3360_562	Basidiomycota	JF495181	325	317/330	96		-	-	0.0540541	0.0163159		-	-	-	-		-	-	0.218818	0.019972		0.0115227
Cordyceps farinosa	Basidiomycota	MH483899	255	255/255	100		0.0326797	-	-	0.0163159		-	-	-	-		-	-	-	-		0.00576136
Agaricomycetes sp. 3360_564	Basidiomycota	KX115947	311	307/311	99		-	0.164069	-	0.0326318		-	-	-	-		-	-	-	-		0.0115227
Mucoromycotina sp. 3360_566	Mucoromycotina	KX115740	331	328/338	97		-	-	-	-		-	0.102041	-	0.0321492		-	-	-	-		0.0115227
Clavaria sp. 3360_570	Basidiomycota	KP012942	320	302/322	94		-	-	-	-		-	0.102041	-	0.0321492		-	-	-	-		0.0115227
Russula puellula	Basidiomycota	KY693660	363	363/364	99		-	-	-	-		-	-	-	-		0.0429	0.0450653	-	0.0399441		0.0115227
Lecanosticta acicola	Ascomycota	MG956783	310	310/310	100		-	0.0820345	-	0.0163159		-	-	-	-		-	-	-	-		0.00576136
Agaricomycetes sp. 3360_582	Basidiomycota	JF519483	307	303/310	98		-	-	-	-		-	-	-	-		0.0858001	-	-	0.0399441		0.0115227
Agonimia sp. 3360_586	Ascomycota	JF509161	256	243/257	95		-	-	-	-		-	-	-	-		0.0858001	-	-	0.0399441		0.0115227
Agaricomycetes sp. 3360_590	Basidiomycota	EU784310	303	251/286	88		-	-	-	-		-	0.102041	-	0.0321492		-	-	-	-		0.0115227
Dothideomycetes sp. 3360_595	Ascomycota	MH452221	249	245/249	98		-	-	-	-		0.0292056	0.0510204	-	0.0321492		-	-	-	-		0.0115227
Leotiomycetes sp. 3360_598	Ascomycota	KJ542232	241	210/245	86		-	0.164069	-	0.0326318		-	-	-	-		-	-	-	-		0.0115227
Leotiomyceta sp. 3360_605	Ascomycota	KF359573	248	245/249	98		-	-	-	-		-	-	-	-		0.0429	-	-	0.019972		0.00576136
Eurotiomycetes sp. 3360_612	Ascomycota	KJ827879	269	259/270	96		-	-	-	-		-	-	-	-		-	0.0901307	-	0.0399441		0.0115227
Rhizoscyphus ericae	Ascomycota	LC131030	236	231/237	97		-	-	-	-		0.0292056	0.0510204	-	0.0321492		-	-	-	-		0.0115227
Pseudotomentella tristis	Basidiomycota	AF274771	299	299/304	98		-	-	-	-		-	-	-	-		0.0858001	-	-	0.0399441		0.0115227
Candida santamariae	Ascomycota	LT548269	280	279/281	99		-	0.0820345	-	0.0163159		0.0292056	-	-	0.0160746		-	-	-	-		0.0115227
Eurotiomycetes sp. 3360_630	Ascomycota	FJ553478	232	223/234	95		-	-	-	-		-	-	-	-		-	0.0901307	-	0.0399441		0.0115227
Agaricomycetes sp. 3360_631	Basidiomycota	KP329587	286	246/267	92		-	-	-	-		-	0.102041	-	0.0321492		-	-	-	-		0.0115227
Leotiomycetes sp. 3360_640	Ascomycota	KC019893	243	230/243	95		-	-	-	-		-	0.102041	-	0.0321492		-	-	-	-		0.0115227
Arcangeliella borziana	Basidiomycota	AF373599	359	349/353	99		-	-	-	-		-	-	-	-		-	0.0901307	-	0.0399441		0.0115227
Lophodermium autumnale	Ascomycota	HQ902158	238	218/240	91		-	-	0.108108	0.0326318		-	-	-	-		-	-	-	-		0.0115227
Sordariomycetes sp. 3360_649	Ascomycota	KT219458	252	248/255	97		-	-	-	-		-	-	-	-		0.0858001	-	-	0.0399441		0.0115227
Magnaporthales sp. 3360_652	Ascomycota	GQ923979	264	253/266	95		-	-	-	-		-	0.102041	-	0.0321492		-	-	-	-		0.0115227
Leotiomycetes sp. 3360_654	Ascomycota	JF519582	239	238/241	99		-	-	-	-		-	-	-	-		0.0429	0.0450653	-	0.0399441		0.0115227
Eurotiomycetes sp. 3360_657	Ascomycota	MF485974	250	238/257	93		-	-	-	-		-	-	-	-		-	0.0901307	-	0.0399441		0.0115227
Eurotiomycetes sp. 3360_659	Ascomycota	JQ346926	260	246/263	94		-	-	-	-		-	-	-	-		0.0858001	-	-	0.0399441		0.0115227
Leotiomycetes sp. 3360_661	Ascomycota	JN655617	238	214/239	90		-	-	-	-		0.0584112	-	-	0.0321492		-	-	-	-		0.0115227
Mortierella sp. 3360_665	Mucoromycotina	MF077647	341	341/342	99		-	-	-	-		0.0292056	0.0510204	-	0.0321492		-	-	-	-		0.0115227
Sporobolomyces symmetricus	Basidiomycota	KJ701207	299	299/300	99		-	-	-	-		-	0.102041	-	0.0321492		-	-	-	-		0.0115227
Hygrocybe konradii var. konradii	Basidiomycota	JF908058	312	310/313	99		-	-	-	-		-	0.102041	-	0.0321492		-	-	-	-		0.0115227
Chaetothyriomycetidae sp. 3360_670	Ascomycota	KP202997	261	246/266	92		-	-	0.0540541	0.0163159		-	-	0.119474	0.0160746		-	-	-	-		0.0115227
Septoria taraxaci	Ascomycota	EF535662	239	238/239	99		-	0.164069	-	0.0326318		-	-	-	-		-	-	-	-		0.0115227
Paraphoma chrysanthemicola	Ascomycota	MH063752	235	234/235	99		-	-	-	-		0.0584112	-	-	0.0321492		-	-	-	-		0.0115227
Saccharomycetes sp. 3360_675	Ascomycota	KX222722	269	246/269	91		-	0.0820345	-	0.0163159		-	-	-	-		0.0429	-	-	0.019972		0.0115227
Tomentellopsis sp. 3360_677	Basidiomycota	KX168655	323	307/323	95		-	-	-	-		-	-	-	-		0.0429	0.0450653	-	0.0399441		0.0115227
Dothideomycetes sp. 3360_679	Ascomycota	MF486801	242	237/242	98		-	-	-	-		-	-	-	-		-	0.0901307	-	0.0399441		0.0115227
Dothideomycetes sp. 3360_681	Ascomycota	AM901716	237	231/239	97		0.0326797	-	0.0540541	0.0326318		-	-	-	-		-	-	-	-		0.0115227
Cistella sp. 3360_682	Ascomycota	MF494618	240	239/240	99		0.0653595	-	-	0.0326318		-	-	-	-		-	-	-	-		0.0115227
Cladophialophora sp. 3360_683	Ascomycota	EU139143	255	249/257	97		0.0653595	-	-	0.0326318		-	-	-	-		-	-	-	-		0.0115227
Leotiomycetes sp. 3360_684	Ascomycota	FR682170	244	225/247	91		-	-	0.108108	0.0326318		-	-	-	-		-	-	-	-		0.0115227
Mortierella pseudozygospora	Mucoromycotina	JX975880	330	324/331	98		-	-	-	-		0.0292056	0.0510204	-	0.0321492		-	-	-	-		0.0115227
Alatospora pulchella	Ascomycota	KF730803	239	228/243	94		0.0653595	-	-	0.0326318		-	-	-	-		-	-	-	-		0.0115227
Archaeorhizomycetes sp. 3360_690	Ascomycota	KJ826784	213	209/213	98		-	-	-	-		-	-	-	-		-	0.0901307	-	0.0399441		0.0115227
Eurotiomycetes sp. 3360_691	Ascomycota	MH451542	251	245/260	94		-	-	-	-		-	0.102041	-	0.0321492		-	-	-	-		0.0115227
Archaeorhizomycetes sp. 3360_692	Ascomycota	MF569783	214	210/214	98		0.0653595	-	-	0.0326318		-	-	-	-		-	-	-	-		0.0115227
Phaeohelotium epiphyllum	Ascomycota	KT876976	235	231/239	97		-	0.164069	-	0.0326318		-	-	-	-		-	-	-	-		0.0115227
Sordariomycetes sp. 3360_696	Ascomycota	FJ552924	258	257/268	96		-	-	-	-		-	-	-	-		-	0.0901307	-	0.0399441		0.0115227
Dothideomycetes sp. 3360_697	Ascomycota	FR682198	243	211/245	86		-	-	0.108108	0.0326318		-	-	-	-		-	-	-	-		0.0115227
Mortierella sp. 3360_700	Mucoromycotina	KF588530	331	322/332	97		0.0326797	0.0820345	-	0.0326318		-	-	-	-		-	-	-	-		0.0115227
Cystofilobasidium capitatum	Basidiomycota	KY103156	321	319/321	99		0.0326797	-	-	0.0163159		-	-	-	-		-	-	0.218818	0.019972		0.0115227
Leotia lubrica	Ascomycota	KF836615	254	253/255	99		-	-	-	-		-	-	-	-		-	0.0901307	-	0.0399441		0.0115227
Galerina sp. 3360_704	Basidiomycota	AF251180	310	293/313	94		0.0326797	0.0820345	-	0.0326318		-	-	-	-		-	-	-	-		0.0115227
Mortierella sp. 3360_706	Mucoromycotina	MF423510	351	349/351	99		-	-	-	-		-	0.0510204	-	0.0160746		-	0.0450653	-	0.019972		0.0115227
Agaricomycetes sp. 3360_712	Basidiomycota	KJ026754	308	298/314	95		-	0.164069	-	0.0326318		-	-	-	-		-	-	-	-		0.0115227
Agaricostilbomycetes sp. 3360_713	Basidiomycota	GU327508	346	299/349	86		-	-	0.0540541	0.0163159		-	-	0.119474	0.0160746		-	-	-	-		0.0115227
Mortierella globulifera	Mucoromycotina	NR_077211	329	327/329	99		-	-	-	-		0.0292056	0.0510204	-	0.0321492		-	-	-	-		0.0115227
Leotiomycetes sp. 3360_717	Ascomycota	KR267062	235	222/236	94		-	0.0820345	-	0.0163159		0.0292056	-	-	0.0160746		-	-	-	-		0.0115227
Agaricomycetes sp. 3360_718	Mucoromycotina	MF484953	287	284/288	99		-	-	-	-		0.0584112	-	-	0.0321492		-	-	-	-		0.0115227
Devriesia sp. 3360_725	Ascomycota	AY251068	237	215/223	96		-	0.0820345	-	0.0163159		-	0.0510204	-	0.0160746		-	-	-	-		0.0115227
Dothideomycetes sp. 3360_726	Ascomycota	LC085195	240	224/244	92		-	-	-	-		0.0292056	0.0510204	-	0.0321492		-	-	-	-		0.0115227
Agaricomycetes sp. 3360_729	Basidiomycota	MH424913	284	260/290	90		-	-	-	-		-	-	-	-		-	0.0450653	0.218818	0.0399441		0.0115227
Hypogymnia tubulosa	Ascomycota	MH536014	241	240/244	98		-	-	-	-		-	-	-	-		-	-	0.437637	0.0399441		0.0115227
Tremellomycetes sp. 3360_731	Basidiomycota	HM240826	252	245/253	97		-	-	0.108108	0.0326318		-	-	-	-		-	-	-	-		0.0115227
Cadophora luteo-olivacea	Ascomycota	MF467888	240	233/243	96		-	-	-	-		-	-	-	-		-	0.0901307	-	0.0399441		0.0115227
Agaricomycetes sp. 3360_733	Basidiomycota	KX115662	315	253/320	79		-	-	-	-		-	0.102041	-	0.0321492		-	-	-	-		0.0115227
Malassezia restricta	Basidiomycota	CP030254	367	367/369	99		-	0.164069	-	0.0326318		-	-	-	-		-	-	-	-		0.0115227
Agaricomycetes sp. 3360_738	Basidiomycota	KY706174	317	289/322	90		-	0.164069	-	0.0326318		-	-	-	-		-	-	-	-		0.0115227
Agaricomycetes sp. 3360_740	Basidiomycota	KP257119	306	288/309	93		-	0.164069	-	0.0326318		-	-	-	-		-	-	-	-		0.0115227
Dothideomycetes sp. 3360_744	Ascomycota	FR682170	244	222/247	90		-	-	0.0540541	0.0163159		-	-	-	-		-	-	0.218818	0.019972		0.0115227
Leotiomycetes sp. 3360_748	Ascomycota	KR267045	238	231/238	97		0.0326797	-	-	0.0163159		-	0.0510204	-	0.0160746		-	-	-	-		0.0115227
Gyromitra esculenta	Ascomycota	GU373505	293	291/293	99		-	-	-	-		-	-	-	-		0.0429	0.0450653	-	0.0399441		0.0115227
Arthoniomycetes sp. 3360_751	Ascomycota	KF617635	290	229/299	77		-	-	0.108108	0.0326318		-	-	-	-		-	-	-	-		0.0115227
Candida boidinii	Ascomycota	KP055797	279	277/279	99		-	-	-	-		-	0.0510204	-	0.0160746		-	0.0450653	-	0.019972		0.0115227
Dothideomycetes sp. 3360_756	Ascomycota	KJ826706	236	224/237	95		-	-	-	-		-	0.102041	-	0.0321492		-	-	-	-		0.0115227
Penicillium chalabudae	Ascomycota	NR_144845	257	256/257	99		-	-	-	-		-	0.102041	-	0.0321492		-	-	-	-		0.0115227
Ramalina sp. 3360_758	Ascomycota	JN084059	250	239/250	96		-	-	-	-		-	-	-	-		-	-	0.437637	0.0399441		0.0115227
Exobasidium arescens	Basidiomycota	FJ896135	294	291/295	99		0.0326797	0.0820345	-	0.0326318		-	-	-	-		-	-	-	-		0.0115227
Phaeosphaeria sp. 3360_762	Ascomycota	KJ529006	247	246/249	99		-	-	0.108108	0.0326318		-	-	-	-		-	-	-	-		0.0115227
Dothideomycetes sp. 3360_763	Ascomycota	MF486423	248	242/249	97		-	-	-	-		-	-	-	-		-	0.0901307	-	0.0399441		0.0115227
Agaricomycetes sp. 3360_764	Basidiomycota	MF483501	316	312/318	98		0.0653595	-	-	0.0326318		-	-	-	-		-	-	-	-		0.0115227
Cladophialophora sp. 3360_766	Ascomycota	MG597449	277	277/278	99		-	-	-	-		-	-	-	-		0.0429	0.0450653	-	0.0399441		0.0115227
Cyphellophora sp. 3360_770	Ascomycota	KC191577	253	242/260	93		-	-	-	-		-	-	-	-		-	-	0.437637	0.0399441		0.0115227
Leotia lubrica	Ascomycota	EU784369	249	249/254	98		-	-	-	-		-	-	-	-		0.0429	0.0450653	-	0.0399441		0.0115227
Dothideomycetes sp. 3360_775	Ascomycota	KJ827253	241	241/244	99		0.0326797	-	0.0540541	0.0326318		-	-	-	-		-	-	-	-		0.0115227
Leotiomycetes sp. 3360_778	Ascomycota	KC834048	244	229/245	93		-	-	-	-		-	-	-	-		-	0.0901307	-	0.0399441		0.0115227
Tetracladium sp. 3360_783	Ascomycota	KT270284	240	236/240	98		-	-	-	-		0.0292056	0.0510204	-	0.0321492		-	-	-	-		0.0115227
Pseudeurotium sp. 3360_785	Ascomycota	KY432737	235	232/241	96		-	0.0820345	-	0.0163159		-	0.0510204	-	0.0160746		-	-	-	-		0.0115227
Oidiodendron sp. 3360_786	Ascomycota	AB986456	235	234/235	99		-	-	-	-		-	-	-	-		0.0858001	-	-	0.0399441		0.0115227
Glomus sp. 3360_792	Mucoromycotina	KF836948	284	281/284	99		-	-	-	-		-	-	-	-		-	0.0901307	-	0.0399441		0.0115227
Sordariomycetes sp. 3360_799	Ascomycota	HG936858	248	247/249	99		-	-	-	-		-	-	-	-		-	0.0901307	-	0.0399441		0.0115227
Sordariomycetes sp. 3360_805	Ascomycota	KJ828097	230	226/234	97		-	0.0820345	-	0.0163159		0.0292056	-	-	0.0160746		-	-	-	-		0.0115227
Phialocephala sp. 3360_811	Ascomycota	KJ817289	236	232/240	97		0.0653595	-	-	0.0326318		-	-	-	-		-	-	-	-		0.0115227
Penicillium sp. 3360_812	Ascomycota	HM036609	252	240/254	94		-	-	-	-		-	-	-	-		-	0.0901307	-	0.0399441		0.0115227
Helotiales sp. 3360_815	Ascomycota	KY228719	237	217/239	91		-	0.0820345	-	0.0163159		0.0292056	-	-	0.0160746		-	-	-	-		0.0115227
Dothideomycetes sp. 3360_818	Ascomycota	MF487115	229	225/234	96		-	-	-	-		-	-	-	-		-	0.0901307	-	0.0399441		0.0115227
Hygrocybe spadicea	Basidiomycota	KF291201	324	316/326	97		-	-	-	-		0.0292056	0.0510204	-	0.0321492		-	-	-	-		0.0115227
Dothideomycetes sp. 3360_822	Ascomycota	KJ827275	240	231/245	94		0.0653595	-	-	0.0326318		-	-	-	-		-	-	-	-		0.0115227
Leotiomycetes sp. 3360_824	Ascomycota	KJ827591	241	238/242	98		-	-	-	-		0.0292056	-	-	0.0160746		-	0.0450653	-	0.019972		0.0115227
Leotiomycetes sp. 3360_828	Ascomycota	NR_156543	236	217/240	90		-	-	0.108108	0.0326318		-	-	-	-		-	-	-	-		0.0115227
Eurotiomycetes sp. 3360_833	Ascomycota	MH451802	256	251/256	98		0.0326797	-	-	0.0163159		-	0.0510204	-	0.0160746		-	-	-	-		0.0115227
Agaricomycetes sp. 3360_835	Basidiomycota	KT351650	313	279/314	89		-	-	-	-		-	0.102041	-	0.0321492		-	-	-	-		0.0115227
Slooffia cresolica	Basidiomycota	KY105427	307	302/308	98		-	-	-	-		-	-	-	-		0.0429	0.0450653	-	0.0399441		0.0115227
Dothideomycetes sp. 3360_837	Ascomycota	LN714003	237	224/239	94		-	-	-	-		-	-	0.238949	0.0321492		-	-	-	-		0.0115227
Ascomycota sp. 3360_839	Ascomycota	KX815494	256	247/260	95		-	-	0.108108	0.0326318		-	-	-	-		-	-	-	-		0.0115227
Agaricomycetes sp. 3360_840	Basidiomycota	MH270630	320	291/329	88		-	-	-	-		-	-	-	-		-	0.0901307	-	0.0399441		0.0115227
Thelephora sp. 3360_842	Basidiomycota	LC029037	309	304/309	98		-	-	-	-		-	-	-	-		0.0429	0.0450653	-	0.0399441		0.0115227
Dothideomycetes sp. 3360_843	Ascomycota	KJ827604	239	236/241	98		-	0.164069	-	0.0326318		-	-	-	-		-	-	-	-		0.0115227
Aquapoterium sp 3360_844	Ascomycota	NR_111345	235	224/238	94		0.0326797	-	-	0.0163159		-	-	-	-		0.0429	-	-	0.019972		0.0115227
Dimorphospora sp. 3360_845	Ascomycota	KY038042	237	224/237	95		-	-	-	-		-	-	-	-		-	0.0901307	-	0.0399441		0.0115227
Solicoccozyma aeria	Basidiomycota	KY105431	320	320/323	99		-	-	-	-		-	0.0510204	-	0.0160746		-	0.0450653	-	0.019972		0.0115227
Mortierella alpina	Mucoromycotina	KX343159	340	340/344	99		-	-	-	-		-	0.102041	-	0.0321492		-	-	-	-		0.0115227
Leptosphaeria biglobosa	Ascomycota	MF687677	249	246/250	98		-	0.0820345	-	0.0163159		-	0.0510204	-	0.0160746		-	-	-	-		0.0115227
Dothideomycetes sp. 3360_854	Ascomycota	MF486220	250	250/251	99		-	-	-	-		-	-	-	-		-	0.0901307	-	0.0399441		0.0115227
Leotiomycetes sp. 3360_856	Ascomycota	HQ022246	241	236/242	98		-	0.164069	-	0.0326318		-	-	-	-		-	-	-	-		0.0115227
Leotiomycetes sp. 3360_857	Ascomycota	FJ378856	237	232/238	97		-	-	-	-		-	-	-	-		-	0.0901307	-	0.0399441		0.0115227
Russula amoenoides	Basidiomycota	KU205283	370	363/373	97		-	-	-	-		-	-	-	-		0.0858001	-	-	0.0399441		0.0115227
Leotiomycetes sp. 3360_864	Ascomycota	KR266584	237	217/238	91		0.0326797	-	-	0.0163159		-	-	-	-		0.0429	-	-	0.019972		0.0115227
Eurotiomycetes sp. 3360_865	Ascomycota	KX776979	257	246/250	98		-	-	-	-		-	0.102041	-	0.0321492		-	-	-	-		0.0115227
Agaricomycetes sp. 3360_867	Basidiomycota	KP889587	281	273/291	94		0.0326797	-	-	0.0163159		0.0292056	-	-	0.0160746		-	-	-	-		0.0115227
Myxotrichum cancellatum	Ascomycota	AF062811	235	234/235	99		0.0326797	-	-	0.0163159		-	-	-	-		0.0429	-	-	0.019972		0.0115227
Dothideomycetes sp. 3360_877	Ascomycota	MF486382	247	239/249	96		-	0.0820345	-	0.0163159		-	0.0510204	-	0.0160746		-	-	-	-		0.0115227
Tremella sp. 3360_878	Basidiomycota	NR_155908	258	250/260	96		-	-	0.108108	0.0326318		-	-	-	-		-	-	-	-		0.0115227
Penicillium sp. 3360_879	Ascomycota	AJ608959	248	247/257	96		-	-	-	-		-	-	-	-		0.0429	0.0450653	-	0.0399441		0.0115227
Tremellomycetes sp. 3360_881	Basidiomycota	KU062911	322	287/333	86		-	-	0.108108	0.0326318		-	-	-	-		-	-	-	-		0.0115227
Monocillium griseo-ochraceum	Ascomycota	NR_156406	267	266/268	99		-	-	-	-		-	0.102041	-	0.0321492		-	-	-	-		0.0115227
Leotiomycetes sp. 3360_883	Ascomycota	JQ313102	242	241/243	99		-	-	-	-		-	-	-	-		0.0429	0.0450653	-	0.0399441		0.0115227
Agaricomycetes sp. 3360_885	Basidiomycota	KX115682	289	274/289	95		-	-	-	-		0.0584112	-	-	0.0321492		-	-	-	-		0.0115227
Capnobotryella sp. 3360_887	Ascomycota	AJ972856	236	236/237	99		-	0.0820345	-	0.0163159		-	-	0.119474	0.0160746		-	-	-	-		0.0115227
Leohumicola minima	Ascomycota	KY228692	238	233/240	97		-	-	-	-		0.0584112	-	-	0.0321492		-	-	-	-		0.0115227
Tausonia pullulans	Basidiomycota	LC202045	312	311/314	99		-	-	-	-		-	-	-	-		-	0.0901307	-	0.0399441		0.0115227
Meliniomyces sp. 3360_890	Ascomycota	EF093175	236	235/237	99		0.0653595	-	-	0.0326318		-	-	-	-		-	-	-	-		0.0115227
Dothideomycetes sp. 3360_893	Ascomycota	KJ827863	248	247/249	99		-	-	0.0540541	0.0163159		-	-	-	-		-	-	0.218818	0.019972		0.0115227
Metapochonia suchlasporia	Ascomycota	MG813181	291	290/291	99		-	0.0820345	-	0.0163159		-	-	-	-		-	0.0450653	-	0.019972		0.0115227
Sordariomycetes sp. 3360_897	Ascomycota	KJ826970	319	315/322	98		-	-	-	-		-	-	-	-		-	0.0901307	-	0.0399441		0.0115227
Pochonia cordycepisociata	Ascomycota	KM263567	276	267/269	99		-	-	-	-		-	0.102041	-	0.0321492		-	-	-	-		0.0115227
Chaetosphaeria sp. 3360_899	Ascomycota	JN559404	240	235/242	97		-	-	-	-		-	-	-	-		-	0.0901307	-	0.0399441		0.0115227
Leotiomycetes sp. 3360_902	Ascomycota	KJ826609	241	239/244	98		-	-	-	-		0.0584112	-	-	0.0321492		-	-	-	-		0.0115227
Amphinema sp. 33360_907	Basidiomycota	JN943898	281	267/290	92		0.0653595	-	-	0.0326318		-	-	-	-		-	-	-	-		0.0115227
Agaricomycetes sp. 3360_909	Basidiomycota	FJ553628	275	272/277	98		0.0653595	-	-	0.0326318		-	-	-	-		-	-	-	-		0.0115227
Mycena epipterygia var. lignicola	Basidiomycota	KP454034	307	306/310	99		0.0653595	-	-	0.0326318		-	-	-	-		-	-	-	-		0.0115227
Tolypocladium sinense	Ascomycota	KX082969	244	243/246	99		-	0.0820345	-	0.0163159		-	-	-	-		-	0.0450653	-	0.019972		0.0115227
Leotiomycetes sp. 3360_916	Ascomycota	HQ021922	239	224/242	93		-	-	-	-		-	0.102041	-	0.0321492		-	-	-	-		0.0115227
Eurotiomycetes sp. 3360_917	Ascomycota	KY484990	293	270/294	92		-	-	-	-		-	-	-	-		0.0429	0.0450653	-	0.0399441		0.0115227
Leotiomycetes sp. 3360_918	Ascomycota	KJ827050	238	220/240	92		-	0.0820345	-	0.0163159		-	0.0510204	-	0.0160746		-	-	-	-		0.0115227
Verticillium leptobactrum	Ascomycota	KC810999	282	277/282	98		-	-	-	-		-	-	-	-		-	0.0901307	-	0.0399441		0.0115227
Agaricomycetes sp. 3360_921	Basidiomycota	AB854709	287	285/288	99		-	-	-	-		-	-	-	-		0.0858001	-	-	0.0399441		0.0115227
Archaeorhizomycetes sp. 3360_922	Ascomycota	JQ347010	218	201/218	92		-	-	-	-		-	0.0510204	-	0.0160746		0.0429	-	-	0.019972		0.0115227
Leotiomycetes sp. 3360_925	Ascomycota	MF486962	240	237/240	99		-	0.0820345	-	0.0163159		-	-	-	-		-	0.0450653	-	0.019972		0.0115227
Pseudotomentella sp. 3360_938	Basidiomycota	AB848561	286	232/254	91		-	-	-	-		-	-	-	-		0.0858001	-	-	0.0399441		0.0115227
Eurotiomycetes sp. 3360_1003	Ascomycota	NR_121503	269	248/270	92		-	-	0.108108	0.0326318		-	-	-	-		-	-	-	-		0.0115227
Leotiomycetes sp. 3360_1041	Ascomycota	FJ554315	235	233/236	99		-	0.164069	-	0.0326318		-	-	-	-		-	-	-	-		0.0115227
Hyaloscypha sp. 3360_1045	Ascomycota	JN033434	239	239/239	100		-	0.164069	-	0.0326318		-	-	-	-		-	-	-	-		0.0115227
Mollisia sp. 3360_1050	Ascomycota	MG195461	238	220/239	92		-	-	-	-		-	-	-	-		0.0858001	-	-	0.0399441		0.0115227
Agaricomycetes sp. 3360_1065	Basidiomycota	HQ021825	302	271/316	86		-	-	-	-		-	0.102041	-	0.0321492		-	-	-	-		0.0115227
Archaeorhizomycetes sp. 3360_1076	Ascomycota	KT196163	217	215/221	97		-	-	-	-		-	0.102041	-	0.0321492		-	-	-	-		0.0115227
Mycoarthris sp. 3360_1120	Ascomycota	KJ735002	236	233/239	97		-	0.164069	-	0.0326318		-	-	-	-		-	-	-	-		0.0115227
Dothideomycetes sp. 3360_1207	Ascomycota	KP897314	250	228/252	90		-	-	-	-		-	-	-	-		-	-	0.437637	0.0399441		0.0115227
Leotiomycetes sp. 3360_1276	Ascomycota	KJ828491	239	226/240	94		-	-	-	-		-	-	-	-		0.0429	0.0450653	-	0.0399441		0.0115227
Sordariomycetes sp. 3360_1340	Ascomycota	MG160372	247	199/200	99		-	-	-	-		0.0584112	-	-	0.0321492		-	-	-	-		0.0115227
Leotiomycetes sp. 3360_1412	Ascomycota	FJ553913	239	237/241	98		-	0.0820345	-	0.0163159		0.0292056	-	-	0.0160746		-	-	-	-		0.0115227
Leotiomycetes sp. 3360_1500	Ascomycota	HQ021922	237	226/240	94		-	-	-	-		-	0.102041	-	0.0321492		-	-	-	-		0.0115227
Lecanoromycetes sp. 3360_1530	Ascomycota	KJ828461	237	226/239	95		-	-	-	-		-	-	-	-		-	0.0901307	-	0.0399441		0.0115227
Pseudogymnoascus sp. 3360_1580	Ascomycota	MG001401	241	241/241	100		-	-	-	-		-	0.102041	-	0.0321492		-	-	-	-		0.0115227
Hymenoscyphus sp. 3360_1704	Ascomycota	EU700265	236	227/235	97		0.0653595	-	-	0.0326318		-	-	-	-		-	-	-	-		0.0115227
Helotiales sp. 3360_1705	Ascomycota	MF043976	241	232/241	96		-	-	0.108108	0.0326318		-	-	-	-		-	-	-	-		0.0115227
Microbotryomycetes sp. 3360_1758	Basidiomycota	KP891320	316	293/324	90		-	-	-	-		-	-	-	-		-	-	0.437637	0.0399441		0.0115227
Microbotryomycetes sp. 3360_1792	Basidiomycota	FM997952	302	301/303	99		-	-	-	-		-	-	-	-		-	0.0901307	-	0.0399441		0.0115227
Leotiomycetes sp. 3360_1801	Ascomycota	FJ553147	250	226/252	90		0.0326797	-	-	0.0163159		-	0.0510204	-	0.0160746		-	-	-	-		0.0115227
Eurotiomycetes sp. 3360_1819	Ascomycota	MF485821	262	245/264	93		-	-	-	-		-	0.102041	-	0.0321492		-	-	-	-		0.0115227
Dothideomycetes sp. 3360_1835	Ascomycota	FR682251	242	222/245	91		-	-	0.0540541	0.0163159		-	-	0.119474	0.0160746		-	-	-	-		0.0115227
Articulospora tetracladia	Ascomycota	LC131005	240	240/240	100		0.0653595	-	-	0.0326318		-	-	-	-		-	-	-	-		0.0115227
Alternaria cheiranthi	Ascomycota	AF229457	250	248/249	99		-	-	0.0540541	0.0163159		-	0.0510204	-	0.0160746		-	-	-	-		0.0115227
Eurotiomycetes sp. 3360_1939	Ascomycota	HQ022099	256	244/257	95		-	-	-	-		0.0584112	-	-	0.0321492		-	-	-	-		0.0115227
Agaricomycetes sp. 3360_1958	Basidiomycota	KC753430	317	311/318	98		0.0326797	0.0820345	-	0.0326318		-	-	-	-		-	-	-	-		0.0115227
Glutinoglossum peregrinans	Ascomycota	KX694173	263	260/269	97		-	-	-	-		-	0.102041	-	0.0321492		-	-	-	-		0.0115227
Eurotiomycetes sp. 3360_1998	Ascomycota	KM023206	269	255/273	93		-	-	-	-		0.0584112	-	-	0.0321492		-	-	-	-		0.0115227
Dothideomycetes sp. 3360_1999	Ascomycota	KF983522	247	228/250	91		-	-	-	-		-	-	-	-		-	-	0.437637	0.0399441		0.0115227
Hypholoma sublateritium	Basidiomycota	KX449453	304	304/305	99		-	-	-	-		-	-	-	-		-	0.0901307	-	0.0399441		0.0115227
Hygrocybe sp. 3360_2205	Basidiomycota	KF291176	318	310/326	95		-	-	-	-		-	0.102041	-	0.0321492		-	-	-	-		0.0115227
Cladophialophora sp. 3360_2221	Ascomycota	GU446638	267	263/268	98		0.0653595	-	-	0.0326318		-	-	-	-		-	-	-	-		0.0115227
Agaricomycetes sp. 3360_2245	Basidiomycota	MF569455	306	303/314	96		-	0.0820345	-	0.0163159		0.0292056	-	-	0.0160746		-	-	-	-		0.0115227
Paraleptosphaeria sp. 3360_2390	Ascomycota	KY554203	247	247/247	100		-	-	-	-		-	-	-	-		0.0429	-	-	0.019972		0.00576136
Sordariomycetes sp. 3360_2437	Ascomycota	KU061960	260	97/105	92		-	-	0.108108	0.0326318		-	-	-	-		-	-	-	-		0.0115227
